# Supplementary material for: The Distribution of Genes Associated With Regulated Cell Death Is Decoupled From the Mitochondrial Phenotypes Within Unicellular Eukaryotic Hosts
Source: Front Cell Dev Biol. 2020 Sep 23;8:536389. doi: 10.3389/fcell.2020.536389 (PMC7539657; doi:10.3389/fcell.2020.536389)
Supplement: Supplementary file 7 [file Table_3.XLSX]

## Sheet: correctedTable_S3
Family	Species / Blast input	Arbitrary sequence ID	NCBI_ID_/_Proteome_ID	Ortholog group
AIF_AMID	Aureococcus anophagefferens	0	XP_009038479.1	1014
AIF_AMID	Aureococcus anophagefferens	1	XP_009042012.1	4630
AIF_AMID	Acanthamoeba castellanii	2	XP_004347249.1	1014
AIF_AMID	Acanthamoeba castellanii	3	XP_004337235.1	8707
AIF_AMID	Acanthamoeba castellanii	4	XP_004336447.1	1014
AIF_AMID	Acanthamoeba castellanii	5	XP_004334707.1	4630
AIF_AMID	Acanthamoeba castellanii	6	XP_004334522.1	1014
AIF_AMID	Allomyces macrogynus	7	KNE54457.1	1014
AIF_AMID	Allomyces macrogynus	8	KNE55482.1	1014
AIF_AMID	Allomyces macrogynus	9	KNE59578.1	4630
AIF_AMID	Allomyces macrogynus	10	KNE66279.1	1014
AIF_AMID	Allomyces macrogynus	11	KNE65087.1	8707
AIF_AMID	Babesia microti	12	XP_012647361.1	1014
AIF_AMID	Babesia microti	13	XP_021337623.1	8707
AIF_AMID	Bigelowiella natans	14	1000118063	1014
AIF_AMID	Bigelowiella natans	15	1000122129	1014
AIF_AMID	Bigelowiella natans	16	1000125521	4630
AIF_AMID	Bigelowiella natans	17	1000127933	6093
AIF_AMID	Bremia lactucae	18	TDH69810.1	8707
AIF_AMID	Bremia lactucae	19	TDH70133.1	1014
AIF_AMID	Bodo saltans	20	CUI11061.1	4630
AIF_AMID	Bodo saltans	21	CUG05974.1	1014
AIF_AMID	Candida albicans	22	XP_718052.2	1014
AIF_AMID	Candida albicans	23	XP_720034.1	1014
AIF_AMID	Chlamydomonas reinhardtii	24	XP_001702271.1	1014
AIF_AMID	Chlamydomonas reinhardtii	25	XP_001703643.1	1014
AIF_AMID	Chlamydomonas reinhardtii	26	XP_001698901.1	1014
AIF_AMID	Cyanidioschyzon merolae	27	XP_005538302.1	1014
AIF_AMID	Cyanidioschyzon merolae	28	XP_005539393.1	8707
AIF_AMID	Cyanidioschyzon merolae	29	XP_005535723.1	1014
AIF_AMID	Capsaspora owczarzaki	30	XP_004365104.1	1014
AIF_AMID	Capsaspora owczarzaki	31	XP_004365398.2	1014
AIF_AMID	Capsaspora owczarzaki	32	XP_004347686.1	4630
AIF_AMID	Capsaspora owczarzaki	33	XP_004343807.1	8707
AIF_AMID	Cyanophora paradoxa	34	1000176810	1014
AIF_AMID	Chlamydomonas reinhardtii	35	XP_001703055.1	4630
AIF_AMID	Chlamydomonas reinhardtii	36	XP_001703056.1	4630
AIF_AMID	Chlamydomonas reinhardtii	37	XP_001700472.1	8707
AIF_AMID	Cryptosporidium parvum	38	XP_628367.1	1014
AIF_AMID	Coccomyxa subellipsoidea	39	XP_005651369.1	6093
AIF_AMID	Coccomyxa subellipsoidea	40	XP_005649659.1	8707
AIF_AMID	Coccomyxa subellipsoidea	41	XP_005648648.1	1014
AIF_AMID	Coccomyxa subellipsoidea	42	XP_005648787.1	1014
AIF_AMID	Coccomyxa subellipsoidea	43	XP_005647002.1	1014
AIF_AMID	Coccomyxa subellipsoidea	44	XP_005643846.1	1014
AIF_AMID	Chlorella variabilis	45	XP_005852222.1	4630
AIF_AMID	Chlorella variabilis	46	XP_005850964.1	1014
AIF_AMID	Chlorella variabilis	47	XP_005849651.1	1014
AIF_AMID	Chlorella variabilis	48	XP_005849210.1	1014
AIF_AMID	Chlorella variabilis	49	XP_005843789.1	1014
AIF_AMID	Dictyostelium discoideum	50	EAL72402.2	1014
AIF_AMID	Dictyostelium discoideum	51	EDR41034.1	1014
AIF_AMID	Dictyostelium discoideum	52	EAL64296.1	4630
AIF_AMID	Dictyostelium discoideum	53	EAL62320.1	1014
AIF_AMID	Dictyostelium discoideum	54	EAL64966.1	4630
AIF_AMID	Dictyostelium discoideum	55	EAL64965.1	4630
AIF_AMID	Dictyostelium discoideum	56	EAL63305.1	8707
AIF_AMID	Ectocarpus siliculosus	57	CBN76274.1	1014
AIF_AMID	Ectocarpus siliculosus	58	CBN78336.1	1014
AIF_AMID	Ectocarpus siliculosus	59	CBN78752.1	1014
AIF_AMID	Emiliania huxleyi	60	XP_005781824.1	1014
AIF_AMID	Emiliania huxleyi	61	XP_005781825.1	1014
AIF_AMID	Emiliania huxleyi	62	XP_005770638.1	6093
AIF_AMID	Emiliania huxleyi	63	XP_005761668.1	1014
AIF_AMID	Entamoeba histolytica	64	XP_655711.1	8707
AIF_AMID	Euglena gracilis	65	[Euglena_gracilis]_transcript_4543	4630
AIF_AMID	Euglena gracilis	66	[Euglena_gracilis]_transcript_8750	4630
AIF_AMID	Fistulifera solaris	67	GAX17842.1	1014
AIF_AMID	Fistulifera solaris	68	GAX22180.1	1014
AIF_AMID	Galdieria sulphuraria	69	XP_005708889.1	8707
AIF_AMID	Galdieria sulphuraria	70	XP_005707127.1	4630
AIF_AMID	Galdieria sulphuraria	71	XP_005705792.1	8707
AIF_AMID	Galdieria sulphuraria	72	XP_005704866.1	1014
AIF_AMID	Guillardia theta	73	XP_005838596.1	6093
AIF_AMID	Guillardia theta	74	XP_005838040.1	1014
AIF_AMID	Guillardia theta	75	XP_005832154.1	4630
AIF_AMID	Guillardia theta	76	XP_005827502.1	8707
AIF_AMID	Guillardia theta	77	XP_005821538.1	1014
AIF_AMID	Heterostelium album	78	XP_020430462.1	1014
AIF_AMID	Heterostelium album	79	XP_020430838.1	1014
AIF_AMID	Heterostelium album	80	XP_020434301.1	4630
AIF_AMID	Heterostelium album	81	XP_020436302.1	8707
AIF_AMID	Heterostelium album	82	XP_020438173.1	4630
AIF_AMID	Ichthyophthirius multifiliis	83	XP_004032401.1	8707
AIF_AMID	Monosiga brevicollis	84	XP_001745625.1	8707
AIF_AMID	Monosiga brevicollis	85	XP_001743036.1	1014
AIF_AMID	Micromonas pusilla	86	XP_003063018.1	8707
AIF_AMID	Micromonas pusilla	87	XP_003060768.1	1014
AIF_AMID	Micromonas pusilla	88	XP_003059256.1	4630
AIF_AMID	Micromonas pusilla	89	XP_003057488.1	1014
AIF_AMID	Mortierella verticillata	90	KFH72753.1	8707
AIF_AMID	Mortierella verticillata	91	KFH67497.1	1014
AIF_AMID	Mortierella verticillata	92	KFH64312.1	4630
AIF_AMID	Mortierella verticillata	93	KFH64357.1	1014
AIF_AMID	Mortierella verticillata	94	KFH63522.1	1014
AIF_AMID	Mortierella verticillata	95	KFH62658.1	4630
AIF_AMID	Naegleria gruberi	96	XP_002672456.1	1014
AIF_AMID	Naegleria gruberi	97	XP_002672148.1	1014
AIF_AMID	Naegleria gruberi	98	XP_002672767.1	8707
AIF_AMID	Nannochloropsis gaditana	99	EWM21650.1	6093
AIF_AMID	Nannochloropsis gaditana	100	EWM27940.1	1014
AIF_AMID	Ostreococcus tauri	101	XP_003079182.1	8707
AIF_AMID	Ostreococcus tauri	102	XP_003078925.2	6093
AIF_AMID	Ostreococcus tauri	103	XP_003075203.2	1014
AIF_AMID	Phytophthora capsici	104	jgi_[Phytophthora_capsici]_101833|e_gw1.6.826.1	4630
AIF_AMID	Phytophthora capsici	105	jgi_[Phytophthora_capsici]_5237|fgenesh1_pm.PHYCAscaffold_5_#_40	4630
AIF_AMID	Phytophthora capsici	106	jgi_[Phytophthora_capsici]_540949|estExt2_Genewise1Plus.C_PHYCAscaffold_50895	1014
AIF_AMID	Phytophthora capsici	107	jgi_[Phytophthora_capsici]_560911|estExt2_Genewise1.C_PHYCAscaffold_50949	1014
AIF_AMID	Phytophthora capsici	108	jgi_[Phytophthora_capsici]_508940|fgenesh2_kg.PHYCAscaffold_40_#_29_#_Contig907.1	4630
AIF_AMID	Phytophthora capsici	109	jgi_[Phytophthora_capsici]_570990|estExt2_Genewise1.C_PHYCAscaffold_400120	4630
AIF_AMID	Phytophthora capsici	110	jgi_[Phytophthora_capsici]_120223|e_gw1.40.274.1	4630
AIF_AMID	Pseudo-nitzschia multiseries	111	1000214231	1014
AIF_AMID	Pseudo-nitzschia multiseries	112	1000223161	1014
AIF_AMID	Porphyridium purpureum	113	1000028915	8707
AIF_AMID	Porphyridium purpureum	114	1000028918	1014
AIF_AMID	Porphyridium purpureum	115	1000030415	1014
AIF_AMID	Porphyridium purpureum	116	1000030465	6093
AIF_AMID	Porphyridium purpureum	117	1000031184	1014
AIF_AMID	Porphyridium purpureum	118	1000032436	4630
AIF_AMID	Paramecium tetraurelia	119	XP_001443175.1	8707
AIF_AMID	Paramecium tetraurelia	120	XP_001433414.1	8707
AIF_AMID	Phaeodactylum tricornutum	121	XP_002179088.1	1014
AIF_AMID	Phaeodactylum tricornutum	122	XP_002184939.1	1014
AIF_AMID	Saccharomyces cerevisiae	123	NP_013865.1	1014
AIF_AMID	Saccharomyces cerevisiae	124	NP_010198.1	1014
AIF_AMID	Saccharomyces cerevisiae	125	NP_013586.1	1014
AIF_AMID	Saccharomyces cerevisiae	126	NP_014472.1	4630
AIF_AMID	Sphaeroforma arctica	127	XP_014160393.1	1014
AIF_AMID	Sphaeroforma arctica	128	XP_014156328.1	8707
AIF_AMID	Sphaeroforma arctica	129	XP_014151383.1	1014
AIF_AMID	Symbiodinium minutum	130	1000256221	1014
AIF_AMID	Symbiodinium minutum	131	1000269704	1014
AIF_AMID	Spizellomyces punctatus	132	XP_016609589.1	1014
AIF_AMID	Spizellomyces punctatus	133	XP_016608525.1	1014
AIF_AMID	Spizellomyces punctatus	134	XP_016607560.1	4630
AIF_AMID	Spizellomyces punctatus	135	XP_016607070.1	8707
AIF_AMID	Salpingoeca rosetta	136	XP_004994935.1	8707
AIF_AMID	Salpingoeca rosetta	137	XP_004998971.1	1014
AIF_AMID	Stentor coeruleus	138	OMJ68024.1	8707
AIF_AMID	Stentor coeruleus	139	OMJ94535.1	8707
AIF_AMID	Stylonychia lemnae	140	CDW74325.1	8707
AIF_AMID	Stylonychia lemnae	141	CDW77535.1	8707
AIF_AMID	Stylonychia lemnae	142	CDW87365.1	8707
AIF_AMID	Toxoplasma gondii	143	XP_002369566.1	8707
AIF_AMID	Toxoplasma gondii	144	XP_002369675.1	1014
AIF_AMID	Thalassiosira pseudonana	145	XP_002295076.1	6093
AIF_AMID	Thalassiosira pseudonana	146	XP_002291541.1	1014
AIF_AMID	Trypanosoma cruzi	147	XP_807312.1	4630
AIF_AMID	Trypanosoma cruzi	148	XP_811027.1	1014
AIF_AMID	Tetrahymena thermophila	149	XP_001007732.1	4630
AIF_AMID	Tetrahymena thermophila	150	XP_001022496.1	8707
AIF_AMID	Thecamonas trahens	151	1000099915	4630
AIF_AMID	Thecamonas trahens	152	1000101827	1014
AIF_AMID	Ustilago maydis	153	XP_011386012.1	8707
AIF_AMID	Ustilago maydis	154	XP_011387435.1	1014
AIF_AMID	Ustilago maydis	155	XP_011388517.1	1014
AIF_AMID	Ustilago maydis	156	XP_011390152.1	1014
AIF_AMID	Ustilago maydis	157	XP_011391447.1	4630
AIF_AMID	Volvox carteri	158	XP_002955192.1	1014
AIF_AMID	Volvox carteri	159	XP_002953151.1	1014
AIF_AMID	Volvox carteri	160	XP_002953221.1	1014
AIF_AMID	Volvox carteri	161	XP_002952814.1	1014
AIF_AMID	Volvox carteri	162	XP_002948928.1	8707
AIF_AMID	Vitrella brassicaformis	163	CEL93662.1	1014
AIF_AMID	Vitrella brassicaformis	164	CEL94337.1	4630
AIF_AMID	Vitrella brassicaformis	165	CEL98203.1	8707
AIF_AMID	Vitrella brassicaformis	166	CEM01006.1	1014
AIF_AMID	Vitrella brassicaformis	167	CEM03292.1	1014
AIF_AMID	Vitrella brassicaformis	168	CEM08681.1	8707
AIF_AMID	Vitrella brassicaformis	169	CEM16609.1	8707
AIF_AMID	Plasmodium falciparum	170	XP_001352022.1	1014
AIF_AMID	Plasmodium falciparum	171	XP_001349105.1	8707
AIF_AMID	Toxoplasma gondii	172	XP_002368319.1	1014
AIF_AMID	Toxoplasma gondii	173	XP_002369675.1	1014
AIF_AMID	Toxoplasma gondii	174	XP_002369566.1	8707
AIF_AMID	Trypanosoma brucei	175	XP_011778323.1	1014
AIF_AMID	Trypanosoma brucei	176	XP_011774852.1	4630
AIF_AMID	Leishmania major	177	XP_001687644.1	4630
AIF_AMID	Leishmania major	178	XP_001687125.1	1014
AIF_AMID	Paramecium tetraurelia	179	XP_001442574.1	4630
AIF_AMID	Paramecium tetraurelia	180	XP_001439766.1	8707
AIF_AMID	Tetrahymena thermophila	181	XP_001025966.2	8707
API5	Bigelowiella natans	182	1000127004	14105
API5	Bremia lactucae	183	TDH73005.1	22824
API5	Cyanophora paradoxa	184	1000169012	14105
API5	Dictyostelium discoideum	185	EAL60987.1	14105
API5	Euglena gracilis	186	[Euglena_gracilis]_transcript_4791	not used
API5	Guillardia theta	187	XP_005834469.1	14105
API5	Heterostelium album	188	XP_020438019.1	14105
API5	Mastigamoeba balamuthi	189	[Mastigamoeba_balamuthi]_m.11094_g.11094_ORF_g.11094_m.11094_comp11761_c1_seq1:85-1839(-)	14105
API5	Monosiga brevicollis	190	XP_001742702.1	not used
API5	Mortierella verticillata	191	KFH66673.1	14105
API5	Naegleria gruberi	192	XP_002670139.1	14105
API5	Salpingoeca rosetta	193	XP_004996055.1	not used
API5	Thecamonas trahens	194	1000096425	not used
API5	Trichomonas vaginalis	195	XP_001318279.1	not used
API5	Trichomonas vaginalis	196	XP_001581816.1	26458
API5	Tritrichomonas foetus	197	OHT00712.1	26458
API5	Tritrichomonas foetus	198	OHT08629.1	26458
API5	Volvox carteri	199	XP_002952709.1	9423
API5	Labeo rohita_200 *** Blast input ***	200	RXN23364.1	2231
API5	Danio rerio_201 *** Blast input ***	201	NP_955834.2	14105
API5	Gallus gallus_202 *** Blast input ***	202	NP_001006474.1	14105
API5	Rattus norvegicus_203 *** Blast input ***	203	NP_001120851.1	14105
API5	Bos taurus_204 *** Blast input ***	204	NP_001137555.1	14105
API5	Macaca mulatta_205 *** Blast input ***	205	NP_001244862.1	14105
API5	Salmo salar_206 *** Blast input ***	206	NP_001133818.1	14105
API5	Castor canadensis_207 *** Blast input ***	207	JAV37766.1	14105
API5	Oryzias sinensis_208 *** Blast input ***	208	AND62528.1	14105
API5	Platysternon megacephalum_209 *** Blast input ***	209	TFK15373.1	3245
API5	Gouania willdenowi_210 *** Blast input ***	210	XP_028307046.1	14105
API5	Parambassis ranga_211 *** Blast input ***	211	XP_028286610.1	14105
API5	Ostrinia furnacalis_212 *** Blast input ***	212	XP_028158013.1	14105
API5	Monomorium pharaonis_213 *** Blast input ***	213	XP_028050137.1	14105
API5	Rhopalosiphum maidis_214 *** Blast input ***	214	XP_026806977.1	14105
API5	Bombyx mandarina_215 *** Blast input ***	215	XP_028039156.1	14105
API5	Asbolus verrucosus_216 *** Blast input ***	216	RZC39308.1	14105
API5	Xiphophorus couchianus_217 *** Blast input ***	217	XP_027896089.1	14105
API5	Aphis gossypii_218 *** Blast input ***	218	XP_027850403.1	14105
API5	Empidonax traillii_219 *** Blast input ***	219	XP_027749493.1	14105
API5	Chelonia mydas_220 *** Blast input ***	220	XP_027679491.1	14105
API5	Tupaia chinensis_221 *** Blast input ***	221	XP_014447329.1	14105
API5	Falco cherrug_222 *** Blast input ***	222	XP_014141906.1	14105
API5	Falco peregrinus_223 *** Blast input ***	223	XP_013158263.1	14105
API5	Corapipo altera_224 *** Blast input ***	224	XP_027498330.1	14105
API5	Anas platyrhynchos_225 *** Blast input ***	225	XP_027313430.1	14105
API5	Larimichthys crocea_226 *** Blast input ***	226	XP_027143897.1	14105
API5	Tachysurus fulvidraco_227 *** Blast input ***	227	XP_027019790.1	14105
API5	Electrophorus electricus_228 *** Blast input ***	228	XP_026874191.1	14105
API5	Ooceraea biroi_229 *** Blast input ***	229	XP_011341200.1	14105
API5	Pangasianodon hypophthalmus_230 *** Blast input ***	230	XP_026775260.1	14105
API5	Galleria mellonella_231 *** Blast input ***	231	XP_026765050.1	14105
API5	Trichoplusia ni_232 *** Blast input ***	232	XP_026747249.1	14105
API5	Diaphorina citri_233 *** Blast input ***	233	XP_017304100.1	14105
API5	Ciona intestinalis_234 *** Blast input ***	234	XP_002131739.1	14105
API5	Panicum miliaceum_235 *** Blast input ***	235	RLN09895.1	14105
API5	Panicum miliaceum_236 *** Blast input ***	236	RLM78581.1	14105
API5	Panicum miliaceum_237 *** Blast input ***	237	RLM77871.1	14105
API5	Ceratina calcarata_238 *** Blast input ***	238	XP_017886924.1	14105
API5	Pseudonaja textilis_239 *** Blast input ***	239	XP_026563111.1	14105
API5	Notechis scutatus_240 *** Blast input ***	240	XP_026520459.1	14105
API5	Vanessa tameamea_241 *** Blast input ***	241	XP_026491582.1	14105
API5	Hyposmocoma kahamanoa_242 *** Blast input ***	242	XP_026326479.1	14105
API5	Apis mellifera_243 *** Blast input ***	243	XP_624077.3	14105
API5	Frankliniella occidentalis_244 *** Blast input ***	244	XP_026293713.1	14105
API5	Anabas testudineus_245 *** Blast input ***	245	XP_026222295.1	14105
API5	Mastacembelus armatus_246 *** Blast input ***	246	XP_026168175.1	14105
API5	Astatotilapia calliptera_247 *** Blast input ***	247	XP_026030905.1	14105
API5	Solenopsis invicta_248 *** Blast input ***	248	XP_025993561.1	14105
API5	Dromaius novaehollandiae_249 *** Blast input ***	249	XP_025949012.1	14105
API5	Nothoprocta perdicaria_250 *** Blast input ***	250	XP_025890551.1	14105
API5	Vulpes vulpes_251 *** Blast input ***	251	XP_025847487.1	14105
API5	Agrilus planipennis_252 *** Blast input ***	252	XP_025836732.1	26458
API5	Parasteatoda tepidariorum_253 *** Blast input ***	253	LAA10648.1	14105
API5	Parasteatoda tepidariorum_254 *** Blast input ***	254	LAA11028.1	not used
API5	Oreochromis niloticus_255 *** Blast input ***	255	XP_003455472.1	14105
API5	Athalia rosae_256 *** Blast input ***	256	XP_012265048.1	14105
API5	Rhizophagus irregularis DAOM 181602=DAOM 197198_257 *** Blast input ***	257	GBC41050.1	14105
API5	Camponotus floridanus_258 *** Blast input ***	258	XP_011253809.1	14105
API5	Melanaphis sacchari_259 *** Blast input ***	259	XP_025205896.1	14105
API5	Harpegnathos saltator_260 *** Blast input ***	260	XP_011139845.1	14105
API5	Pogonomyrmex barbatus_261 *** Blast input ***	261	XP_011642301.1	14105
API5	Pelodiscus sinensis_262 *** Blast input ***	262	XP_006124575.1	14105
API5	Python bivittatus_263 *** Blast input ***	263	XP_007442834.1	14105
API5	Tetranychus urticae_264 *** Blast input ***	264	XP_015787483.1	14105
API5	Cephus cinctus_265 *** Blast input ***	265	XP_015608567.1	14105
API5	Cynoglossus semilaevis_266 *** Blast input ***	266	XP_008309710.1	14105
API5	Artemisia annua_267 *** Blast input ***	267	PWA79929.1	14105
API5	Artemisia annua_268 *** Blast input ***	268	PWA79928.1	14105
API5	Temnothorax curvispinosus_269 *** Blast input ***	269	XP_024876446.1	14105
API5	Kryptolebias marmoratus_270 *** Blast input ***	270	XP_017288325.1	14105
API5	Bombus impatiens_271 *** Blast input ***	271	XP_012247161.1	14105
API5	Oryzias melastigma_272 *** Blast input ***	272	XP_024136879.1	14105
API5	Salvelinus alpinus_273 *** Blast input ***	273	XP_023854662.1	14105
API5	Salvelinus alpinus_274 *** Blast input ***	274	XP_023840707.1	14105
API5	Chrysemys picta bellii_275 *** Blast input ***	275	XP_005286812.1	14105
API5	Oryzias latipes_276 *** Blast input ***	276	XP_004069450.1	14105
API5	Cyanistes caeruleus_277 *** Blast input ***	277	XP_023783671.1	14105
API5	Cryptotermes secundus_278 *** Blast input ***	278	XP_023726490.1	14105
API5	Paramormyrops kingsleyae_279 *** Blast input ***	279	XP_023698023.1	14105
API5	Loxodonta africana_280 *** Blast input ***	280	XP_023406683.1	14105
API5	Anoplophora glabripennis_281 *** Blast input ***	281	XP_018572063.1	14105
API5	Trichogramma pretiosum_282 *** Blast input ***	282	XP_014234899.1	14105
API5	Orussus abietinus_283 *** Blast input ***	283	XP_012286250.1	14105
API5	Copidosoma floridanum_284 *** Blast input ***	284	XP_014213934.1	14105
API5	Amphiprion ocellaris_285 *** Blast input ***	285	XP_023125005.1	14105
API5	Columba livia_286 *** Blast input ***	286	PKK31691.1	14105
API5	Leptinotarsa decemlineata_287 *** Blast input ***	287	XP_023013648.1	14105
API5	Onthophagus taurus_288 *** Blast input ***	288	XP_022899949.1	14105
API5	Spodoptera litura_289 *** Blast input ***	289	XP_022828878.1	14105
API5	Nothobranchius furzeri_290 *** Blast input ***	290	SBP62832.1	14105
API5	Nothobranchius rachovii_291 *** Blast input ***	291	SBS12729.1	14105
API5	Nothobranchius korthausae_292 *** Blast input ***	292	SBQ67066.1	14105
API5	Iconisemion striatum_293 *** Blast input ***	293	SBP09593.1	14105
API5	Iconisemion striatum_294 *** Blast input ***	294	SBP38104.1	14105
API5	Astyanax mexicanus_295 *** Blast input ***	295	XP_022528012.1	14105
API5	Pyrrhoderma noxium_296 *** Blast input ***	296	PAV18367.1	14105
API5	Myzus persicae_297 *** Blast input ***	297	XP_022167228.1	14105
API5	Pieris rapae_298 *** Blast input ***	298	XP_022120634.1	14105
API5	Acanthochromis polyacanthus_299 *** Blast input ***	299	XP_022067455.1	14105
API5	Carlito syrichta_300 *** Blast input ***	300	XP_021575188.1	14105
API5	Lonchura striata domestica_301 *** Blast input ***	301	XP_021388893.1	14105
API5	Bombyx mori_302 *** Blast input ***	302	XP_004928046.2	14105
API5	Helicoverpa armigera_303 *** Blast input ***	303	XP_021191813.1	14105
API5	Fundulus heteroclitus_304 *** Blast input ***	304	XP_012717961.1	14105
API5	Columba livia_305 *** Blast input ***	305	XP_021140237.1	14105
API5	Parasteatoda tepidariorum_306 *** Blast input ***	306	XP_015909406.1	14105
API5	Boleophthalmus pectinirostris_307 *** Blast input ***	307	XP_020780606.1	14105
API5	Bombus terrestris_308 *** Blast input ***	308	XP_020723231.1	14105
API5	Pogona vitticeps_309 *** Blast input ***	309	XP_020653866.1	14105
API5	Monopterus albus_310 *** Blast input ***	310	XP_020481168.1	14105
API5	Labrus bergylta_311 *** Blast input ***	311	XP_020492195.1	14105
API5	Corvus cornix cornix_312 *** Blast input ***	312	XP_010395745.1	14105
API5	Rhincodon typus_313 *** Blast input ***	313	XP_020389656.1	14105
API5	Patagioenas fasciata monilis_314 *** Blast input ***	314	OPJ82840.1	14105
API5	Pseudomyrmex gracilis_315 *** Blast input ***	315	XP_020289436.1	14105
API5	Lentinula edodes_316 *** Blast input ***	316	GAW08048.1	14105
API5	Crassostrea gigas_317 *** Blast input ***	317	XP_011414695.1	14105
API5	Esox lucius_318 *** Blast input ***	318	XP_010862770.1	14105
API5	Aethina tumida_319 *** Blast input ***	319	XP_019871527.1	14105
API5	Dendroctonus ponderosae_320 *** Blast input ***	320	XP_019755890.1	14105
API5	Hippocampus comes_321 *** Blast input ***	321	XP_019750426.1	14105
API5	Meleagris gallopavo_322 *** Blast input ***	322	XP_019471649.1	14105
API5	Crocodylus porosus_323 *** Blast input ***	323	XP_019407467.1	14105
API5	Aptenodytes forsteri_324 *** Blast input ***	324	XP_019327154.1	14105
API5	Parus major_325 *** Blast input ***	325	XP_015485868.1	14105
API5	Bemisia tabaci_326 *** Blast input ***	326	XP_018906928.1	14105
API5	Serinus canaria_327 *** Blast input ***	327	XP_009100393.1	14105
API5	Scleropages formosus_328 *** Blast input ***	328	XP_018621090.1	14105
API5	Galendromus occidentalis_329 *** Blast input ***	329	XP_018495539.1	14105
API5	Galendromus occidentalis_330 *** Blast input ***	330	XP_003745778.1	14105
API5	Nanorana parkeri_331 *** Blast input ***	331	XP_018410476.1	14105
API5	Cyphomyrmex costatus_332 *** Blast input ***	332	XP_018397272.1	14105
API5	Trachymyrmex cornetzi_333 *** Blast input ***	333	XP_018369366.1	14105
API5	Trachymyrmex septentrionalis_334 *** Blast input ***	334	XP_018352730.1	14105
API5	Trachymyrmex zeteki_335 *** Blast input ***	335	XP_018316924.1	14105
API5	Atta colombica_336 *** Blast input ***	336	XP_018058931.1	14105
API5	Xenopus tropicalis_337 *** Blast input ***	337	XP_002937342.2	14105
API5	Habropoda laboriosa_338 *** Blast input ***	338	XP_017792791.1	14105
API5	Nicrophorus vespilloides_339 *** Blast input ***	339	XP_017783767.1	14105
API5	Eufriesea mexicana_340 *** Blast input ***	340	XP_017753576.1	14105
API5	Corvus brachyrhynchos_341 *** Blast input ***	341	XP_017597094.1	14105
API5	Pygocentrus nattereri_342 *** Blast input ***	342	XP_017554950.1	14105
API5	synthetic construct_343 *** Blast input ***	343	AAX43379.1	14105
API5	Macaca fascicularis_344 *** Blast input ***	344	AAV67412.1	14105
API5	Ictalurus punctatus_345 *** Blast input ***	345	XP_017341629.1	14105
API5	Cucumis melo_346 *** Blast input ***	346	XP_008439781.1	14105
API5	Anolis carolinensis_347 *** Blast input ***	347	XP_008103919.1	14105
API5	Nasonia vitripennis_348 *** Blast input ***	348	XP_016839113.1	14105
API5	Gossypium hirsutum_349 *** Blast input ***	349	XP_016752010.1	14105
API5	Acyrthosiphon pisum_350 *** Blast input ***	350	XP_001945854.1	14105
API5	Ficedula albicollis_351 *** Blast input ***	351	XP_005047027.1	14105
API5	Carios mimon_352 *** Blast input ***	352	JAR87114.1	not used
API5	Rousettus aegyptiacus_353 *** Blast input ***	353	XP_016002331.1	14105
API5	Alligator mississippiensis_354 *** Blast input ***	354	KYO21817.1	14105
API5	Oryza brachyantha_355 *** Blast input ***	355	XP_006664945.1	14105
API5	Protobothrops mucrosquamatus_356 *** Blast input ***	356	XP_015673948.1	14105
API5	Neodiprion lecontei_357 *** Blast input ***	357	XP_015513854.1	14105
API5	Dufourea novaeangliae_358 *** Blast input ***	358	XP_015428458.1	14105
API5	Diuraphis noxia_359 *** Blast input ***	359	XP_015378766.1	14105
API5	Gekko japonicus_360 *** Blast input ***	360	XP_015266822.1	14105
API5	Cyprinodon variegatus_361 *** Blast input ***	361	XP_015242015.1	14105
API5	Lepisosteus oculatus_362 *** Blast input ***	362	XP_006642504.2	14105
API5	Polistes dominula_363 *** Blast input ***	363	XP_015180553.1	14105
API5	Diachasma alloeum_364 *** Blast input ***	364	XP_015121080.1	14105
API5	Hymenolepis microstoma_365 *** Blast input ***	365	CDS34106.1	14105
API5	Echinococcus multilocularis_366 *** Blast input ***	366	CDS40311.1	14105
API5	Calidris pugnax_367 *** Blast input ***	367	XP_014792652.1	14105
API5	Polistes canadensis_368 *** Blast input ***	368	XP_014599823.1	14105
API5	Myotis brandtii_369 *** Blast input ***	369	XP_014398770.1	14105
API5	Camelus ferus_370 *** Blast input ***	370	XP_014422319.1	14105
API5	Amazona aestiva_371 *** Blast input ***	371	KQK73662.1	14105
API5	Latimeria chalumnae_372 *** Blast input ***	372	XP_005986969.1	14105
API5	Microplitis demolitor_373 *** Blast input ***	373	XP_008545864.1	14105
API5	Clonorchis sinensis_374 *** Blast input ***	374	GAA30677.2	14105
API5	Haplochromis burtoni_375 *** Blast input ***	375	XP_005931699.1	14105
API5	Geospiza fortis_376 *** Blast input ***	376	XP_005419619.2	14105
API5	Salmo salar_377 *** Blast input ***	377	XP_013980183.1	14105
API5	Thamnophis sirtalis_378 *** Blast input ***	378	XP_013920423.1	21895
API5	Thamnophis sirtalis_379 *** Blast input ***	379	XP_013931559.1	14105
API5	Apteryx australis mantelli_380 *** Blast input ***	380	XP_013814690.1	14105
API5	Pundamilia nyererei_381 *** Blast input ***	381	XP_005731541.1	14105
API5	Amyelois transitella_382 *** Blast input ***	382	XP_013185588.1	14105
API5	Papilio xuthus_383 *** Blast input ***	383	XP_013175329.1	14105
API5	Papilio polytes_384 *** Blast input ***	384	XP_013135202.1	14105
API5	Melopsittacus undulatus_385 *** Blast input ***	385	XP_005154315.1	14105
API5	Erythranthe guttata_386 *** Blast input ***	386	XP_012849071.1	14105
API5	Clupea harengus_387 *** Blast input ***	387	XP_012697981.1	14105
API5	Propithecus coquereli_388 *** Blast input ***	388	XP_012510775.1	14105
API5	Taeniopygia guttata_389 *** Blast input ***	389	XP_012429309.1	14105
API5	Gossypium raimondii_390 *** Blast input ***	390	XP_012451849.1	14105
API5	Rana pirica_391 *** Blast input ***	391	BAR73140.1	not used
API5	Linepithema humile_392 *** Blast input ***	392	XP_012229529.1	14105
API5	Megachile rotundata_393 *** Blast input ***	393	XP_003700428.1	14105
API5	Vollenhovia emeryi_394 *** Blast input ***	394	XP_011862796.1	14105
API5	Wasmannia auropunctata_395 *** Blast input ***	395	XP_011701236.1	14105
API5	Strongylocentrotus purpuratus_396 *** Blast input ***	396	XP_011666417.1	14105
API5	Cucumis sativus_397 *** Blast input ***	397	XP_011658235.1	14105
API5	Cricetulus griseus_398 *** Blast input ***	398	ERE91548.1	14105
API5	Cricetulus griseus_399 *** Blast input ***	399	ERE69606.1	14105
API5	Plutella xylostella_400 *** Blast input ***	400	XP_011547997.1	14105
API5	Takifugu rubripes_401 *** Blast input ***	401	XP_003967254.1	14105
API5	Ceratosolen solmsi marchali_402 *** Blast input ***	402	XP_011498362.1	14105
API5	Fragaria vesca subsp. vesca_403 *** Blast input ***	403	XP_011460596.1	14105
API5	Fopius arisanus_404 *** Blast input ***	404	XP_011297898.1	14105
API5	Notothenia coriiceps_405 *** Blast input ***	405	XP_010783066.1	14105
API5	Pygoscelis adeliae_406 *** Blast input ***	406	XP_009328010.1	14105
API5	Phaethon lepturus_407 *** Blast input ***	407	XP_010280042.1	14105
API5	Tinamus guttatus_408 *** Blast input ***	408	XP_010223834.1	14105
API5	Chlamydotis macqueenii_409 *** Blast input ***	409	XP_010118544.1	14105
API5	Mesitornis unicolor_410 *** Blast input ***	410	XP_010192127.1	14105
API5	Pterocles gutturalis_411 *** Blast input ***	411	XP_010083496.1	14105
API5	Antrostomus carolinensis_412 *** Blast input ***	412	XP_010165122.1	14105
API5	Eurypyga helias_413 *** Blast input ***	413	XP_010155988.1	14105
API5	Buceros rhinoceros silvestris_414 *** Blast input ***	414	XP_010141230.1	14105
API5	Chaetura pelagica_415 *** Blast input ***	415	XP_009997882.1	14105
API5	Tyto alba_416 *** Blast input ***	416	XP_009973786.1	14105
API5	Tauraco erythrolophus_417 *** Blast input ***	417	XP_009978428.1	14105
API5	Nestor notabilis_418 *** Blast input ***	418	XP_010010971.1	14105
API5	Leptosomus discolor_419 *** Blast input ***	419	XP_009957903.1	14105
API5	Opisthocomus hoazin_420 *** Blast input ***	420	XP_009933607.1	14105
API5	Picoides pubescens_421 *** Blast input ***	421	XP_009901924.1	14105
API5	Charadrius vociferus_422 *** Blast input ***	422	XP_009893996.1	14105
API5	Apaloderma vittatum_423 *** Blast input ***	423	XP_009876009.1	14105
API5	Cariama cristata_424 *** Blast input ***	424	XP_009704098.1	14105
API5	Egretta garzetta_425 *** Blast input ***	425	XP_009645904.1	14105
API5	Struthio camelus australis_426 *** Blast input ***	426	XP_009681136.1	14105
API5	Fulmarus glacialis_427 *** Blast input ***	427	XP_009586359.1	14105
API5	Cuculus canorus_428 *** Blast input ***	428	XP_009568354.1	14105
API5	Phalacrocorax carbo_429 *** Blast input ***	429	XP_009498601.1	14105
API5	Nipponia nippon_430 *** Blast input ***	430	XP_009471110.1	14105
API5	Acanthisitta chloris_431 *** Blast input ***	431	XP_009082349.1	14105
API5	Paracyclopina nana_432 *** Blast input ***	432	AII16537.1	14105
API5	Echinococcus granulosus_433 *** Blast input ***	433	CDS15487.1	14105
API5	Ursus maritimus_434 *** Blast input ***	434	XP_008699329.1	14105
API5	Stegastes partitus_435 *** Blast input ***	435	XP_008292308.1	14105
API5	Chlorocebus sabaeus_436 *** Blast input ***	436	XP_007999381.1	14105
API5	Callorhinchus milii_437 *** Blast input ***	437	XP_007885839.1	14105
API5	Saccoglossus kowalevskii_438 *** Blast input ***	438	XP_002731277.1	14105
API5	Moniliophthora roreri MCA 2997_439 *** Blast input ***	439	ESK83384.1	14105
API5	Micrurus fulvius_440 *** Blast input ***	440	JAB54670.1	14105
API5	Homo sapiens_441 *** Blast input ***	441	NP_001230676.1	14105
API5	Homo sapiens_442 *** Blast input ***	442	NP_001136403.1	14105
API5	Mus musculus_443 *** Blast input ***	443	NP_031492.2	14105
API5	Mus musculus_444 *** Blast input ***	444	NP_001292187.1	14105
API5	Mus musculus_445 *** Blast input ***	445	NP_001335932.1	14105
API5	Bos taurus_446 *** Blast input ***	446	XP_024831206.1	14105
API5	Homo sapiens_447 *** Blast input ***	447	XP_016873954.1	14105
API5	Homo sapiens_448 *** Blast input ***	448	XP_016873953.1	14105
API5	Homo sapiens_449 *** Blast input ***	449	XP_006718422.1	14105
API5	Rattus norvegicus_450 *** Blast input ***	450	XP_006234648.1	14105
API5	Brachionus plicatilis_451 *** Blast input ***	451	RNA30903.1	14105
API5	Artemia franciscana_452 *** Blast input ***	452	ABV60394.1	6153
API5	Helianthus annuus_453 *** Blast input ***	453	OTF95275.1	14105
API5	Perca flavescens_454 *** Blast input ***	454	XP_028441957.1	14105
API5	Perca flavescens_455 *** Blast input ***	455	XP_028441956.1	14105
API5	Lynx pardinus_456 *** Blast input ***	456	VFV35406.1	14105
API5	Lynx pardinus_457 *** Blast input ***	457	VFV35405.1	14105
API5	Phyllostomus discolor_458 *** Blast input ***	458	XP_028370509.1	14105
API5	Phyllostomus discolor_459 *** Blast input ***	459	XP_028370508.1	14105
API5	Phyllostomus discolor_460 *** Blast input ***	460	XP_028370507.1	14105
API5	Phyllostomus discolor_461 *** Blast input ***	461	XP_028370506.1	14105
API5	Physeter catodon_462 *** Blast input ***	462	XP_007126464.1	14105
API5	Physeter catodon_463 *** Blast input ***	463	XP_007126463.1	14105
API5	Diabrotica virgifera virgifera_464 *** Blast input ***	464	XP_028142752.1	14105
API5	Eptesicus fuscus_465 *** Blast input ***	465	XP_028009403.1	14105
API5	Eptesicus fuscus_466 *** Blast input ***	466	XP_028009402.1	14105
API5	Eptesicus fuscus_467 *** Blast input ***	467	XP_008145012.1	14105
API5	Eptesicus fuscus_468 *** Blast input ***	468	XP_008145011.1	14105
API5	Balaenoptera acutorostrata scammoni_469 *** Blast input ***	469	XP_007181159.1	14105
API5	Balaenoptera acutorostrata scammoni_470 *** Blast input ***	470	XP_007181158.1	14105
API5	Eumetopias jubatus_471 *** Blast input ***	471	XP_027967041.1	14105
API5	Eumetopias jubatus_472 *** Blast input ***	472	XP_027967040.1	14105
API5	Ovis aries_473 *** Blast input ***	473	XP_011951655.1	14105
API5	Ovis aries_474 *** Blast input ***	474	XP_004016465.1	14105
API5	Marmota flaviventris_475 *** Blast input ***	475	XP_027792283.1	14105
API5	Marmota flaviventris_476 *** Blast input ***	476	XP_027792282.1	14105
API5	Vombatus ursinus_477 *** Blast input ***	477	XP_027693573.1	14105
API5	Vombatus ursinus_478 *** Blast input ***	478	XP_027693572.1	14105
API5	Pipra filicauda_479 *** Blast input ***	479	XP_027588442.1	14105
API5	Neopelma chrysocephalum_480 *** Blast input ***	480	XP_027560094.1	14105
API5	Neopelma chrysocephalum_481 *** Blast input ***	481	XP_027560084.1	14105
API5	Zalophus californianus_482 *** Blast input ***	482	XP_027435966.1	14105
API5	Bos indicus x Bos taurus_483 *** Blast input ***	483	XP_027418425.1	14105
API5	Cricetulus griseus_484 *** Blast input ***	484	XP_027278209.1	14105
API5	Cricetulus griseus_485 *** Blast input ***	485	XP_027278208.1	14105
API5	Cricetulus griseus_486 *** Blast input ***	486	XP_027278207.1	14105
API5	Lagenorhynchus obliquidens_487 *** Blast input ***	487	XP_026970760.1	14105
API5	Drosophila persimilis_488 *** Blast input ***	488	XP_002020793.1	14105
API5	Drosophila erecta_489 *** Blast input ***	489	XP_015012083.1	14105
API5	Athene cunicularia_490 *** Blast input ***	490	XP_026706736.1	14105
API5	Athene cunicularia_491 *** Blast input ***	491	XP_026706735.1	14105
API5	Zonotrichia albicollis_493 *** Blast input ***	493	XP_026650709.1	14105
API5	Microtus ochrogaster_494 *** Blast input ***	494	XP_005364170.1	14105
API5	Microtus ochrogaster_495 *** Blast input ***	495	XP_005364169.1	14105
API5	Ctenocephalides felis_496 *** Blast input ***	496	XP_026466555.1	14105
API5	Piliocolobus tephrosceles_497 *** Blast input ***	497	XP_023071591.1	14105
API5	Piliocolobus tephrosceles_498 *** Blast input ***	498	XP_023071590.1	14105
API5	Urocitellus parryii_499 *** Blast input ***	499	XP_026260021.1	14105
API5	Apteryx rowi_500 *** Blast input ***	500	XP_025947509.1	14105
API5	Apteryx rowi_501 *** Blast input ***	501	XP_025947496.1	14105
API5	Apteryx rowi_502 *** Blast input ***	502	XP_025947487.1	14105
API5	Agrilus planipennis_503 *** Blast input ***	503	XP_025836780.1	908
API5	Puma concolor_504 *** Blast input ***	504	XP_025783901.1	14105
API5	Puma concolor_505 *** Blast input ***	505	XP_025783900.1	14105
API5	Manacus vitellinus_506 *** Blast input ***	506	XP_017937869.1	14105
API5	Sipha flava_507 *** Blast input ***	507	XP_025407921.1	14105
API5	Sipha flava_508 *** Blast input ***	508	XP_025407920.1	14105
API5	Canis lupus dingo_509 *** Blast input ***	509	XP_025308313.1	14105
API5	Canis lupus dingo_510 *** Blast input ***	510	XP_025308312.1	14105
API5	Canis lupus dingo_511 *** Blast input ***	511	XP_025308310.1	14105
API5	Alligator sinensis_512 *** Blast input ***	512	XP_025071830.1	14105
API5	Alligator sinensis_513 *** Blast input ***	513	XP_006034148.1	14105
API5	Pteropus alecto_514 *** Blast input ***	514	XP_024899872.1	14105
API5	Pteropus alecto_515 *** Blast input ***	515	XP_006908108.1	14105
API5	Pteropus alecto_516 *** Blast input ***	516	XP_006908107.1	14105
API5	Desmodus rotundus_517 *** Blast input ***	517	XP_024414658.1	14105
API5	Desmodus rotundus_518 *** Blast input ***	518	XP_024414657.1	14105
API5	Halyomorpha halys_519 *** Blast input ***	519	XP_014289848.2	14105
API5	Prunus yedoensis var. nudiflora_520 *** Blast input ***	520	PQQ04590.1	14105
API5	Cimex lectularius_521 *** Blast input ***	521	XP_014246200.1	14105
API5	Bicyclus anynana_522 *** Blast input ***	522	XP_023951269.1	14105
API5	Myotis lucifugus_523 *** Blast input ***	523	XP_023617453.1	14105
API5	Myotis lucifugus_524 *** Blast input ***	524	XP_023617451.1	14105
API5	Myotis lucifugus_525 *** Blast input ***	525	XP_023617450.1	14105
API5	Trichechus manatus latirostris_526 *** Blast input ***	526	XP_023594231.1	14105
API5	Trichechus manatus latirostris_527 *** Blast input ***	527	XP_012412608.1	14105
API5	Trichechus manatus latirostris_528 *** Blast input ***	528	XP_004369869.1	14105
API5	Octodon degus_529 *** Blast input ***	529	XP_004627088.1	14105
API5	Octodon degus_530 *** Blast input ***	530	XP_004627087.1	14105
API5	Equus caballus_531 *** Blast input ***	531	XP_005598102.2	14105
API5	Equus caballus_532 *** Blast input ***	532	XP_001488315.3	14105
API5	Cavia porcellus_533 *** Blast input ***	533	XP_005001614.1	14105
API5	Cavia porcellus_534 *** Blast input ***	534	XP_003465235.1	14105
API5	Dasypus novemcinctus_535 *** Blast input ***	535	XP_004476322.1	14105
API5	Dasypus novemcinctus_536 *** Blast input ***	536	XP_004476321.1	14105
API5	Otolemur garnettii_537 *** Blast input ***	537	XP_012658474.1	14105
API5	Otolemur garnettii_538 *** Blast input ***	538	XP_003781288.1	14105
API5	Sarcophilus harrisii_539 *** Blast input ***	539	XP_023362102.1	14105
API5	Sarcophilus harrisii_540 *** Blast input ***	540	XP_012408032.2	14105
API5	Lucilia cuprina_541 *** Blast input ***	541	XP_023308569.1	14105
API5	Seriola lalandi dorsalis_542 *** Blast input ***	542	XP_023256124.1	14105
API5	Seriola lalandi dorsalis_543 *** Blast input ***	543	XP_023256123.1	14105
API5	Limosa lapponica baueri_544 *** Blast input ***	544	PKU30000.1	14105
API5	Drosophila hydei_545 *** Blast input ***	545	XP_023164201.1	14105
API5	Drosophila willistoni_546 *** Blast input ***	546	XP_002067193.1	14105
API5	Apostichopus japonicus_547 *** Blast input ***	547	PIK45703.1	14105
API5	Apostichopus japonicus_548 *** Blast input ***	548	PIK37761.1	3415
API5	Apostichopus japonicus_549 *** Blast input ***	549	PIK37760.1	14105
API5	Vigna radiata var. radiata_550 *** Blast input ***	550	XP_022632829.1	14105
API5	Seriola dumerili_551 *** Blast input ***	551	XP_022611730.1	14105
API5	Seriola dumerili_552 *** Blast input ***	552	XP_022611729.1	14105
API5	Enhydra lutris kenyoni_553 *** Blast input ***	553	XP_022362694.1	14105
API5	Enhydra lutris kenyoni_554 *** Blast input ***	554	XP_022362693.1	14105
API5	Enhydra lutris kenyoni_555 *** Blast input ***	555	XP_022362692.1	14105
API5	Enhydra lutris kenyoni_556 *** Blast input ***	556	XP_022362691.1	14105
API5	Drosophila obscura_557 *** Blast input ***	557	XP_022230321.1	14105
API5	Nilaparvata lugens_558 *** Blast input ***	558	XP_022185008.1	14105
API5	Zootermopsis nevadensis_559 *** Blast input ***	559	XP_021928947.1	14105
API5	Papio anubis_560 *** Blast input ***	560	XP_021781587.1	14105
API5	Papio anubis_561 *** Blast input ***	561	XP_021781586.1	14105
API5	Papio anubis_562 *** Blast input ***	562	XP_021781585.1	14105
API5	Aedes aegypti_563 *** Blast input ***	563	XP_021701664.1	14105
API5	Neomonachus schauinslandi_564 *** Blast input ***	564	XP_021541057.1	14105
API5	Neomonachus schauinslandi_565 *** Blast input ***	565	XP_021541056.1	14105
API5	Aotus nancymaae_566 *** Blast input ***	566	XP_012307819.1	14105
API5	Aotus nancymaae_567 *** Blast input ***	567	XP_012307818.1	14105
API5	Meriones unguiculatus_568 *** Blast input ***	568	XP_021482984.1	14105
API5	Meriones unguiculatus_569 *** Blast input ***	569	XP_021482977.1	14105
API5	Numida meleagris_570 *** Blast input ***	570	XP_021257024.1	14105
API5	Numida meleagris_571 *** Blast input ***	571	XP_021257023.1	14105
API5	Heterocephalus glaber_572 *** Blast input ***	572	XP_004852060.1	14105
API5	Heterocephalus glaber_573 *** Blast input ***	573	XP_004852059.1	14105
API5	Mesocricetus auratus_574 *** Blast input ***	574	XP_012977506.1	14105
API5	Mesocricetus auratus_575 *** Blast input ***	575	XP_005064940.1	14105
API5	Mesocricetus auratus_576 *** Blast input ***	576	XP_005064939.1	14105
API5	Mus caroli_577 *** Blast input ***	577	XP_021009710.1	14105
API5	Mus caroli_578 *** Blast input ***	578	XP_021009706.1	14105
API5	Mus caroli_579 *** Blast input ***	579	XP_021009701.1	14105
API5	Mus pahari_580 *** Blast input ***	580	XP_021048222.1	14105
API5	Mus pahari_581 *** Blast input ***	581	XP_021048221.1	14105
API5	Mus pahari_582 *** Blast input ***	582	XP_021048220.1	14105
API5	Mus pahari_583 *** Blast input ***	583	XP_021048219.1	14105
API5	Mus pahari_584 *** Blast input ***	584	XP_021048218.1	14105
API5	Sus scrofa_585 *** Blast input ***	585	XP_005661041.1	14105
API5	Sus scrofa_586 *** Blast input ***	586	XP_003122904.1	14105
API5	Phascolarctos cinereus_587 *** Blast input ***	587	XP_020865381.1	14105
API5	Phascolarctos cinereus_588 *** Blast input ***	588	XP_020865380.1	14105
API5	Drosophila serrata_589 *** Blast input ***	589	XP_020812283.1	14105
API5	Odocoileus virginianus texanus_590 *** Blast input ***	590	XP_020738653.1	14105
API5	Odocoileus virginianus texanus_591 *** Blast input ***	591	XP_020738642.1	14105
API5	Microcebus murinus_592 *** Blast input ***	592	XP_012646158.1	14105
API5	Microcebus murinus_593 *** Blast input ***	593	XP_012646148.1	14105
API5	Microcebus murinus_594 *** Blast input ***	594	XP_012646138.1	14105
API5	Castor canadensis_595 *** Blast input ***	595	XP_020017933.1	14105
API5	Paralichthys olivaceus_596 *** Blast input ***	596	XP_019934985.1	14105
API5	Paralichthys olivaceus_597 *** Blast input ***	597	XP_019934983.1	14105
API5	Aedes albopictus_598 *** Blast input ***	598	XP_019550959.1	14105
API5	Aedes albopictus_599 *** Blast input ***	599	XP_019541823.1	14105
API5	Musca domestica_600 *** Blast input ***	600	XP_005182803.1	14105
API5	Hipposideros armiger_601 *** Blast input ***	601	XP_019515496.1	14105
API5	Hipposideros armiger_602 *** Blast input ***	602	XP_019515495.1	14105
API5	Fukomys damarensis_603 *** Blast input ***	603	XP_010610839.1	14105
API5	Fukomys damarensis_604 *** Blast input ***	604	XP_010610838.1	14105
API5	Fukomys damarensis_605 *** Blast input ***	605	XP_010610837.1	14105
API5	Lates calcarifer_606 *** Blast input ***	606	XP_018541187.1	14105
API5	Drosophila navojoa_607 *** Blast input ***	607	XP_017953919.1	3766
API5	Drosophila arizonae_608 *** Blast input ***	608	XP_017857977.1	14105
API5	Drosophila busckii_609 *** Blast input ***	609	XP_017854471.1	14105
API5	Lepidothrix coronata_610 *** Blast input ***	610	XP_017665133.1	14105
API5	Lepidothrix coronata_611 *** Blast input ***	611	XP_017665125.1	14105
API5	Nannospalax galili_612 *** Blast input ***	612	XP_008847148.1	14105
API5	Nannospalax galili_613 *** Blast input ***	613	XP_008847147.1	14105
API5	Manis javanica_614 *** Blast input ***	614	XP_017525066.1	14105
API5	Manis javanica_615 *** Blast input ***	615	XP_017525065.1	14105
API5	Oryctolagus cuniculus_616 *** Blast input ***	616	XP_008268168.1	14105
API5	Oryctolagus cuniculus_617 *** Blast input ***	617	XP_002709107.1	14105
API5	Poecilia reticulata_618 *** Blast input ***	618	XP_008408989.1	14105
API5	Poecilia reticulata_619 *** Blast input ***	619	XP_008408988.1	14105
API5	Drosophila bipectinata_620 *** Blast input ***	620	XP_017107187.1	14105
API5	Drosophila rhopaloa_621 *** Blast input ***	621	XP_016987292.1	14105
API5	Drosophila biarmipes_622 *** Blast input ***	622	XP_016964220.1	14105
API5	Drosophila miranda_623 *** Blast input ***	623	XP_017153996.1	14105
API5	Drosophila elegans_624 *** Blast input ***	624	XP_017117019.1	14105
API5	Drosophila ficusphila_625 *** Blast input ***	625	XP_017044833.1	14105
API5	Drosophila eugracilis_626 *** Blast input ***	626	XP_017063902.1	14105
API5	Drosophila takahashii_627 *** Blast input ***	627	XP_016993640.1	14105
API5	Drosophila kikkawai_628 *** Blast input ***	628	XP_017037428.1	14105
API5	Drosophila suzukii_629 *** Blast input ***	629	XP_016945263.1	14105
API5	Prunus mume_630 *** Blast input ***	630	XP_016648728.1	14105
API5	Prunus mume_631 *** Blast input ***	631	XP_016648727.1	14105
API5	Poecilia formosa_632 *** Blast input ***	632	XP_007578712.1	14105
API5	Poecilia formosa_633 *** Blast input ***	633	XP_007578711.1	14105
API5	Monodelphis domestica_634 *** Blast input ***	634	XP_007497404.1	14105
API5	Monodelphis domestica_635 *** Blast input ***	635	XP_001362630.2	14105
API5	Sinocyclocheilus grahami_636 *** Blast input ***	636	XP_016115822.1	14105
API5	Sinocyclocheilus grahami_637 *** Blast input ***	637	XP_016115818.1	14105
API5	Ornithorhynchus anatinus_638 *** Blast input ***	638	XP_007657222.1	14105
API5	Ornithorhynchus anatinus_639 *** Blast input ***	639	XP_001509256.1	14105
API5	Miniopterus natalensis_640 *** Blast input ***	640	XP_016053137.1	14105
API5	Miniopterus natalensis_641 *** Blast input ***	641	XP_016053136.1	14105
API5	Erinaceus europaeus_642 *** Blast input ***	642	XP_007537851.1	14105
API5	Erinaceus europaeus_643 *** Blast input ***	643	XP_007537850.1	14105
API5	Erinaceus europaeus_644 *** Blast input ***	644	XP_007537849.1	14105
API5	Erinaceus europaeus_645 *** Blast input ***	645	XP_007537848.1	14105
API5	Peromyscus maniculatus bairdii_646 *** Blast input ***	646	XP_015856526.1	14105
API5	Tribolium castaneum_647 *** Blast input ***	647	XP_008191854.1	14105
API5	Tribolium castaneum_648 *** Blast input ***	648	XP_974012.2	14105
API5	Nothobranchius furzeri_649 *** Blast input ***	649	XP_015819346.1	14105
API5	Myotis davidii_650 *** Blast input ***	650	XP_015424977.1	14105
API5	Myotis davidii_651 *** Blast input ***	651	XP_015424976.1	14105
API5	Vicugna pacos_652 *** Blast input ***	652	XP_015101651.1	14105
API5	Vicugna pacos_653 *** Blast input ***	653	XP_006212394.1	14105
API5	Vicugna pacos_654 *** Blast input ***	654	XP_006212393.1	14105
API5	Poecilia latipinna_655 *** Blast input ***	655	XP_014876706.1	14105
API5	Poecilia latipinna_656 *** Blast input ***	656	XP_014876705.1	14105
API5	Poecilia mexicana_657 *** Blast input ***	657	XP_014869035.1	14105
API5	Poecilia mexicana_658 *** Blast input ***	658	XP_014869034.1	14105
API5	Equus asinus_659 *** Blast input ***	659	XP_014716721.1	14105
API5	Equus asinus_660 *** Blast input ***	660	XP_014716720.1	14105
API5	Ceratotherium simum simum_661 *** Blast input ***	661	XP_014647989.1	14105
API5	Ceratotherium simum simum_662 *** Blast input ***	662	XP_004436935.1	14105
API5	Dinoponera quadriceps_663 *** Blast input ***	663	XP_014482422.1	14105
API5	Papilio machaon_664 *** Blast input ***	664	XP_014371592.1	not used
API5	Bos mutus_665 *** Blast input ***	665	XP_005905993.1	14105
API5	Pseudopodoces humilis_666 *** Blast input ***	666	XP_014107567.1	14105
API5	Pseudopodoces humilis_667 *** Blast input ***	667	XP_005522459.1	14105
API5	Austrofundulus limnaeus_668 *** Blast input ***	668	XP_013880523.1	14105
API5	Austrofundulus limnaeus_669 *** Blast input ***	669	XP_013880522.1	14105
API5	Chinchilla lanigera_670 *** Blast input ***	670	XP_005384146.1	14105
API5	Chinchilla lanigera_671 *** Blast input ***	671	XP_005384145.1	14105
API5	Stomoxys calcitrans_672 *** Blast input ***	672	XP_013114491.1	14105
API5	Anser cygnoides domesticus_673 *** Blast input ***	673	XP_013049578.1	14105
API5	Anser cygnoides domesticus_674 *** Blast input ***	674	XP_013049572.1	14105
API5	Mustela putorius furo_675 *** Blast input ***	675	XP_012917200.1	14105
API5	Mustela putorius furo_676 *** Blast input ***	676	XP_004763265.1	14105
API5	Mustela putorius furo_677 *** Blast input ***	677	XP_004763264.1	14105
API5	Dipodomys ordii_678 *** Blast input ***	678	XP_012885475.1	14105
API5	Dipodomys ordii_679 *** Blast input ***	679	XP_012885473.1	14105
API5	Echinops telfairi_680 *** Blast input ***	680	XP_004708366.1	14105
API5	Echinops telfairi_681 *** Blast input ***	681	XP_004708365.1	14105
API5	Echinops telfairi_682 *** Blast input ***	682	XP_004708364.1	14105
API5	Echinops telfairi_683 *** Blast input ***	683	XP_004708363.1	14105
API5	Jaculus jaculus_684 *** Blast input ***	684	XP_004663391.1	14105
API5	Jaculus jaculus_685 *** Blast input ***	685	XP_004663390.1	14105
API5	Jaculus jaculus_686 *** Blast input ***	686	XP_004663389.1	14105
API5	Jaculus jaculus_687 *** Blast input ***	687	XP_004663388.1	14105
API5	Sorex araneus_688 *** Blast input ***	688	XP_004607976.1	14105
API5	Sorex araneus_689 *** Blast input ***	689	XP_004607975.1	14105
API5	Sorex araneus_690 *** Blast input ***	690	XP_004607974.1	14105
API5	Sorex araneus_691 *** Blast input ***	691	XP_004607973.1	14105
API5	Ochotona princeps_692 *** Blast input ***	692	XP_004585451.1	14105
API5	Ochotona princeps_693 *** Blast input ***	693	XP_004585450.1	14105
API5	Ochotona princeps_694 *** Blast input ***	694	XP_004585449.1	14105
API5	Ochotona princeps_695 *** Blast input ***	695	XP_004585448.1	14105
API5	Condylura cristata_696 *** Blast input ***	696	XP_004682952.1	14105
API5	Condylura cristata_697 *** Blast input ***	697	XP_004682951.1	14105
API5	Gossypium raimondii_698 *** Blast input ***	698	XP_012441825.1	14105
API5	Orcinus orca_699 *** Blast input ***	699	XP_004264070.1	14105
API5	Orcinus orca_700 *** Blast input ***	700	XP_004264071.1	14105
API5	Atta cephalotes_701 *** Blast input ***	701	XP_012054574.1	14105
API5	Cercocebus atys_702 *** Blast input ***	702	XP_011917705.1	14105
API5	Colobus angolensis palliatus_703 *** Blast input ***	703	XP_011818649.1	14105
API5	Camelus ferus_704 *** Blast input ***	704	EPY74079.1	14105
API5	Aquila chrysaetos canadensis_705 *** Blast input ***	705	XP_011586488.1	14105
API5	Aquila chrysaetos canadensis_706 *** Blast input ***	706	XP_011586487.1	14105
API5	Aquila chrysaetos canadensis_707 *** Blast input ***	707	XP_011586486.1	14105
API5	Acromyrmex echinatior_708 *** Blast input ***	708	XP_011064219.1	14105
API5	Camelus dromedarius_709 *** Blast input ***	709	XP_010998906.1	14105
API5	Camelus dromedarius_710 *** Blast input ***	710	XP_010998905.1	14105
API5	Camelus bactrianus_711 *** Blast input ***	711	XP_010962957.1	14105
API5	Camelus bactrianus_712 *** Blast input ***	712	XP_010962956.1	14105
API5	Haliaeetus leucocephalus_713 *** Blast input ***	713	XP_010578485.1	14105
API5	Haliaeetus leucocephalus_714 *** Blast input ***	714	XP_010578484.1	14105
API5	Saimiri boliviensis boliviensis_715 *** Blast input ***	715	XP_010331866.1	14105
API5	Saimiri boliviensis boliviensis_716 *** Blast input ***	716	XP_003920056.1	14105
API5	Balearica regulorum gibbericeps_717 *** Blast input ***	717	XP_010302128.1	14105
API5	Haliaeetus albicilla_718 *** Blast input ***	718	XP_009912924.1	14105
API5	Haliaeetus albicilla_719 *** Blast input ***	719	XP_009912923.1	14105
API5	Haliaeetus albicilla_720 *** Blast input ***	720	XP_009912922.1	14105
API5	Gavia stellata_721 *** Blast input ***	721	XP_009820427.1	14105
API5	Pelecanus crispus_722 *** Blast input ***	722	XP_009478432.1	14105
API5	Merops nubicus_723 *** Blast input ***	723	XP_008934877.1	14105
API5	Galeopterus variegatus_724 *** Blast input ***	724	XP_008574029.1	14105
API5	Galeopterus variegatus_725 *** Blast input ***	725	XP_008574027.1	14105
API5	Galeopterus variegatus_726 *** Blast input ***	726	XP_008574026.1	14105
API5	Calypte anna_727 *** Blast input ***	727	XP_008497195.1	14105
API5	Orycteropus afer afer_728 *** Blast input ***	728	XP_007944702.1	14105
API5	Orycteropus afer afer_729 *** Blast input ***	729	XP_007944701.1	14105
API5	Orycteropus afer afer_730 *** Blast input ***	730	XP_007944700.1	14105
API5	Orycteropus afer afer_731 *** Blast input ***	731	XP_007944699.1	14105
API5	Pantholops hodgsonii_732 *** Blast input ***	732	XP_005974980.1	14105
API5	Pantholops hodgsonii_733 *** Blast input ***	733	XP_005974979.1	14105
API5	Pantholops hodgsonii_734 *** Blast input ***	734	XP_005974978.1	14105
API5	Pantholops hodgsonii_735 *** Blast input ***	735	XP_005974977.1	14105
API5	Xenopus laevis_736 *** Blast input ***	736	NP_001080226.1	14105
API5	Xenopus laevis_737 *** Blast input ***	737	NP_001086837.1	14105
API5	Drosophila_melanogaster_738 *** Blast input ***	738	sp|Q9V431.1|API5_DROME_RecName:_Full=Apoptosis_inhibitor_5_homolog;_Short=API-5;_AltName:_Full=Antiapoptosis_clone_11_protein_homolog;_Short=AAC-11	14105
API5	Trifolium pratense_739 *** Blast input ***	739	PNY06266.1	14105
API5	Trifolium pratense_740 *** Blast input ***	740	PNX80197.1	14105
API5	Trifolium pratense_741 *** Blast input ***	741	PNX69355.1	14105
ATG101	Acanthamoeba castellanii	742	XP_004341607.1	7161
ATG101	Acanthamoeba castellanii	743	XP_004341609.1	7161
ATG101	Bigelowiella natans	744	1000117216	7161
ATG101	Bremia lactucae	745	TDH71334.1	7161
ATG101	Candida albicans	746	XP_019330707.1	7161
ATG101	Capsaspora owczarzaki	747	XP_004348827.1	7161
ATG101	Chlamydomonas reinhardtii	748	XP_001700159.1	7161
ATG101	Chlorella variabilis	749	XP_005849008.1	7161
ATG101	Coccomyxa subellipsoidea	750	XP_005644092.1	7161
ATG101	Dictyostelium discoideum	751	EAL63286.1	7161
ATG101	Ectocarpus siliculosus	752	CBN79615.1	7161
ATG101	Emiliania huxleyi	753	XP_005793213.1	7161
ATG101	Euglena gracilis	754	[Euglena_gracilis]_transcript_24618	7161
ATG101	Fistulifera solaris	755	GAX26074.1	7161
ATG101	Fistulifera solaris	756	GAX24308.1	7161
ATG101	Heterostelium album	757	XP_020431634.1	7161
ATG101	Micromonas pusilla	758	XP_003057605.1	7161
ATG101	Mortierella verticillata	759	KFH73422.1	7161
ATG101	Nannochloropsis gaditana	760	EWM26010.1	7161
ATG101	Neocallimastix californiae	761	ORY75611.1	7161
ATG101	Ostreococcus tauri	762	XP_022841140.1	7161
ATG101	Paramecium tetraurelia	763	XP_001442935.1	not used
ATG101	Paramecium tetraurelia	764	XP_001443291.1	not used
ATG101	Phytophthora capsici	765	jgi_[Phytophthora_capsici]_505218|fgenesh2_kg.PHYCAscaffold_12_#_6_#_Contig3879.1	7161
ATG101	Pseudo-nitzschia multiseries	766	1000220534	7161
ATG101	Reticulomyxa filosa	767	ETO11401.1	not used
ATG101	Salpingoeca rosetta	768	XP_004991657.1	not used
ATG101	Symbiodinium minutum	769	1000238895	not used
ATG101	Sphaeroforma arctica	770	XP_014158858.1	7161
ATG101	Spizellomyces punctatus	771	XP_016612419.1	7161
ATG101	Stylonychia lemnae	772	CDW71566.1	9353
ATG101	Tetrahymena thermophila	773	XP_001019624.2	7161
ATG101	Thalassiosira pseudonana	774	XP_002287468.1	7161
ATG101	Toxoplasma gondii	775	XP_018636738.1	7161
ATG101	Trichomonas vaginalis	776	XP_001289896.1	7161
ATG101	Tritrichomonas foetus	777	OHS95259.1	7161
ATG101	Ustilago maydis	778	XP_011389822.1	7161
ATG101	Vitrella brassicaformis	779	CEL98417.1	7161
ATG101	Volvox carteri	780	XP_002951085.1	7161
ATG11	Acanthamoeba castellanii	781	XP_004338154.1	2379
ATG11	Aureococcus anophagefferens	782	XP_009033404.1	2379
ATG11	Bigelowiella natans	783	1000113664	2379
ATG11	Bremia lactucae	784	TDH65909.1	2379
ATG11	Bremia lactucae	785	TDH72613.1	1891
ATG11	Candida albicans	786	XP_722686.1	2379
ATG11	Capsaspora owczarzaki	787	XP_004363454.1	2379
ATG11	Cyanophora paradoxa	788	1000184742	not used
ATG11	Ectocarpus siliculosus	789	CBJ28919.1	2379
ATG11	Euglena gracilis	790	[Euglena_gracilis]_transcript_14753	2379
ATG11	Fistulifera solaris	791	GAX28434.1	2379
ATG11	Fistulifera solaris	792	GAX19396.1	2379
ATG11	Guillardia theta	793	XP_005827513.1	2379
ATG11	Guillardia theta	794	XP_005835065.1	2379
ATG11	Heterostelium album	795	XP_020436575.1	2379
ATG11	Mortierella verticillata	796	KFH65634.1	2379
ATG11	Nannochloropsis gaditana	797	EWM26785.1	2379
ATG11	Neocallimastix californiae	798	ORY73283.1	not used
ATG11	Phaeodactylum tricornutum	799	XP_002186517.1	2379
ATG11	Phytophthora capsici	800	jgi_[Phytophthora_capsici]_507816|fgenesh2_kg.PHYCAscaffold_30_#_85_#_Contig327.1	2379
ATG11	Phytophthora capsici	801	jgi_[Phytophthora_capsici]_128994|e_gw1.80.128.1	2379
ATG11	Pseudo-nitzschia multiseries	802	1000210760	2379
ATG11	Saccharomyces cerevisiae	803	NP_015374.1	2379
ATG11	Sphaeroforma arctica	804	XP_014155812.1	not used
ATG11	Spizellomyces punctatus	805	XP_016612172.1	2379
ATG11	Stentor coeruleus	806	OMJ68444.1	2379
ATG11	Thalassiosira pseudonana	807	XP_002289246.1	2379
ATG11	Ustilago maydis	808	XP_011389733.1	2379
ATG12	Acanthamoeba castellanii	809	XP_004338763.1	13272
ATG12	Allomyces macrogynus	810	KNE54331.1	13272
ATG12	Allomyces macrogynus	811	KNE65233.1	13272
ATG12	Aureococcus anophagefferens	812	XP_009032147.1	13272
ATG12	Bigelowiella natans	813	1000107234	13272
ATG12	Bremia lactucae	814	TDH69169.1	13272
ATG12	Candida albicans	815	XP_722235.1	13272
ATG12	Capsaspora owczarzaki	816	XP_004363647.1	13272
ATG12	Chlamydomonas reinhardtii	817	XP_001702830.1	13272
ATG12	Chlorella variabilis	818	XP_005843432.1	13272
ATG12	Coccomyxa subellipsoidea	819	XP_005643919.1	13272
ATG12	Cyanophora paradoxa	820	1000174217	13272
ATG12	Dictyostelium discoideum	821	EAL65908.1	13272
ATG12	Ectocarpus siliculosus	822	CBJ33065.1	13272
ATG12	Emiliania huxleyi	823	XP_005779622.1	13272
ATG12	Euglena gracilis	824	[Euglena_gracilis]_transcript_33177	13272
ATG12	Guillardia theta	825	XP_005821186.1	13272
ATG12	Heterostelium album	826	XP_020431824.1	13272
ATG12	Micromonas pusilla	827	XP_003058399.1	13272
ATG12	Mortierella verticillata	828	KFH73152.1	13272
ATG12	Naegleria gruberi	829	XP_002671119.1	13272
ATG12	Nannochloropsis gaditana	830	EWM26340.1	13272
ATG12	Neocallimastix californiae	831	ORY24424.1	13272
ATG12	Ostreococcus tauri	832	XP_022839153.1	13272
ATG12	Phytophthora capsici	833	jgi_[Phytophthora_capsici]_528578|estExt2_fgenesh1_pm.C_PHYCAscaffold_310058	13272
ATG12	Plasmodium falciparum	834	XP_002585478.1	13272
ATG12	Pseudo-nitzschia multiseries	835	1000215091	13272
ATG12	Reticulomyxa filosa	836	ETO31684.1	13272
ATG12	Saccharomyces cerevisiae	837	NP_009776.1	13272
ATG12	Salpingoeca rosetta	838	XP_004989507.1	13272
ATG12	Sphaeroforma arctica	839	XP_014159059.1	13272
ATG12	Spizellomyces punctatus	840	XP_016605347.1	13272
ATG12	Stentor coeruleus	841	OMJ96079.1	13272
ATG12	Thalassiosira pseudonana	842	XP_002291258.1	13272
ATG12	Thecamonas trahens	843	1000104909	13272
ATG12	Toxoplasma gondii	844	XP_018638395.1	13272
ATG12	Trichomonas vaginalis	845	XP_001308621.1	not used
ATG12	Trypanosoma cruzi	846	XP_817747.1	16814
ATG12	Ustilago maydis	847	XP_011390120.1	13272
ATG12	Vitrella brassicaformis	848	CEL99395.1	13272
ATG13	Acanthamoeba castellanii	849	XP_004339324.1	not used
ATG13	Bigelowiella natans	850	1000115862	not used
ATG13	Bremia lactucae	851	TDH69992.1	12831
ATG13	Candida albicans	852	XP_715779.2	12831
ATG13	Capsaspora owczarzaki	853	XP_004347600.2	12831
ATG13	Chlorella variabilis	854	XP_005851242.1	12831
ATG13	Coccomyxa subellipsoidea	855	XP_005643511.1	12831
ATG13	Dictyostelium discoideum	856	EAL71931.1	12831
ATG13	Ectocarpus siliculosus	857	CBJ29505.1	12831
ATG13	Emiliania huxleyi	858	XP_005789469.1	12831
ATG13	Euglena gracilis	859	[Euglena_gracilis]_transcript_12152	12831
ATG13	Fistulifera solaris	860	GAX25812.1	12831
ATG13	Fistulifera solaris	861	GAX13289.1	12831
ATG13	Heterostelium album	862	XP_020437258.1	12831
ATG13	Micromonas pusilla	863	XP_003061623.1	12831
ATG13	Mortierella verticillata	864	KFH73127.1	12831
ATG13	Nannochloropsis gaditana	865	EWM23855.1	12831
ATG13	Neocallimastix californiae	866	ORY74893.1	12831
ATG13	Ostreococcus tauri	867	XP_022839894.1	not used
ATG13	Phaeodactylum tricornutum	868	XP_002176466.1	12831
ATG13	Phytophthora capsici	869	jgi_[Phytophthora_capsici]_572232|estExt2_Genewise1.C_PHYCAscaffold_470106	12831
ATG13	Pseudo-nitzschia multiseries	870	1000211593	12831
ATG13	Saccharomyces cerevisiae	871	NP_015511.1	12831
ATG13	Salpingoeca rosetta	872	XP_004988802.1	not used
ATG13	Sphaeroforma arctica	873	XP_014148765.1	not used
ATG13	Spizellomyces punctatus	874	XP_016612473.1	3197
ATG13	Spizellomyces punctatus	875	XP_016610959.1	12831
ATG13	Thalassiosira pseudonana	876	XP_002294456.1	12831
ATG13	Trichomonas vaginalis	877	XP_001300736.1	25622
ATG13	Trichomonas vaginalis	878	XP_001309454.1	not used
ATG13	Trichomonas vaginalis	879	XP_001329124.1	not used
ATG13	Tritrichomonas foetus	880	OHT11122.1	25622
ATG13	Tritrichomonas foetus	881	OHT15931.1	not used
ATG13	Ustilago maydis	882	XP_011388304.1	12831
ATG13	Vitrella brassicaformis	883	CEM00772.1	12831
ATG1	Acanthamoeba castellanii	884	XP_004367560.1	1891
ATG1	Bigelowiella natans	885	1000109554	not used
ATG1	Bremia lactucae	886	TDH69846.1	1891
ATG1	Candida albicans	887	XP_717245.2	1891
ATG1	Capsaspora owczarzaki	888	XP_004347520.2	1891
ATG1	Cyanophora paradoxa	889	1000167228	1891
ATG1	Dictyostelium discoideum	890	EAL61174.1	1891
ATG1	Emiliania huxleyi	891	XP_005778027.1	1891
ATG1	Fistulifera solaris	892	GAX22535.1	1891
ATG1	Heterostelium album	893	XP_020438277.1	1891
ATG1	Mortierella verticillata	894	KFH65152.1	1891
ATG1	Nannochloropsis gaditana	895	EWM22424.1	1891
ATG1	Saccharomyces cerevisiae	896	NP_011335.1	1891
ATG1	Sphaeroforma arctica	897	XP_014156154.1	1891
ATG1	Spizellomyces punctatus	898	XP_016612260.1	1891
ATG1	Stentor coeruleus	899	OMJ69895.1	1891
ATG1	Ustilago maydis	900	XP_011392657.1	1891
ATG3_10	Acanthamoeba castellanii	901	XP_004341306.1	1665
ATG3_10	Acanthamoeba castellanii	902	XP_004368146.1	3698
ATG3_10	Allomyces macrogynus	903	KNE55991.1	1665
ATG3_10	Allomyces macrogynus	904	KNE58789.1	1665
ATG3_10	Allomyces macrogynus	905	KNE62710.1	3698
ATG3_10	Aureococcus anophagefferens	906	XP_009043420.1	1665
ATG3_10	Babesia microti	907	XP_021337358.1	1665
ATG3_10	Bigelowiella natans	908	1000121124	1665
ATG3_10	Bodo saltans	909	CUG84642.1	1665
ATG3_10	Bremia lactucae	910	TDH68854.1	1665
ATG3_10	Bremia lactucae	911	TDH71714.1	1665
ATG3_10	Candida albicans	912	XP_719983.1	not used
ATG3_10	Candida albicans	913	XP_718982.1	1665
ATG3_10	Capsaspora owczarzaki	914	XP_004349824.2	1665
ATG3_10	Capsaspora owczarzaki	915	XP_004349408.2	3698
ATG3_10	Chlamydomonas reinhardtii	916	XP_001692913.1	3698
ATG3_10	Chlamydomonas reinhardtii	917	XP_001699795.1	1665
ATG3_10	Chlorella variabilis	918	XP_005846146.1	3698
ATG3_10	Chlorella variabilis	919	XP_005846212.1	1665
ATG3_10	Coccomyxa subellipsoidea	920	XP_005650519.1	1665
ATG3_10	Cyanophora paradoxa	921	1000154920	3698
ATG3_10	Cyanophora paradoxa	922	1000158019	1665
ATG3_10	Cryptosporidium parvum	923	XP_627163.1	1665
ATG3_10	Dictyostelium discoideum	924	EAL73009.1	3698
ATG3_10	Dictyostelium discoideum	925	EAL68846.2	1665
ATG3_10	Ectocarpus siliculosus	926	CBJ29817.1	1665
ATG3_10	Emiliania huxleyi	927	XP_005758664.1	3698
ATG3_10	Emiliania huxleyi	928	XP_005794510.1	1665
ATG3_10	Entamoeba histolytica	929	XP_650505.1	not used
ATG3_10	Entamoeba histolytica	930	XP_654705.1	1665
ATG3_10	Euglena gracilis	931	[Euglena_gracilis]_transcript_20857	3698
ATG3_10	Euglena gracilis	932	[Euglena_gracilis]_transcript_37887	1665
ATG3_10	Euglena gracilis	933	[Euglena_gracilis]_transcript_43345	1665
ATG3_10	Fistulifera solaris	934	GAX16113.1	1665
ATG3_10	Fistulifera solaris	935	GAX10210.1	1665
ATG3_10	Guillardia theta	936	XP_005838372.1	1665
ATG3_10	Guillardia theta	937	XP_005839428.1	3698
ATG3_10	Heterostelium album	938	XP_020438094.1	3698
ATG3_10	Heterostelium album	939	XP_020435344.1	1665
ATG3_10	Ichthyophthirius multifiliis	940	XP_004031038.1	1665
ATG3_10	Ichthyophthirius multifiliis	941	XP_004031303.1	1665
ATG3_10	Leishmania donovani	942	XP_003863856.1	1665
ATG3_10	Leishmania major	943	XP_001685756.1	1665
ATG3_10	Mastigamoeba balamuthi	944	[Mastigamoeba_balamuthi]_m.4492_g.4492_ORF_g.4492_m.4492_comp4405_c0_seq1:461-1405(-)	1665
ATG3_10	Micromonas pusilla	945	XP_003062013.1	1665
ATG3_10	Monocercomonoides exilis	946	[Monocercomonoides_sp.]_predicted_protein_16819	1665
ATG3_10	Monocercomonoides exilis	947	[Monocercomonoides_sp.]_predicted_protein_3432	1665
ATG3_10	Monocercomonoides exilis	948	[Monocercomonoides_sp.]_predicted_protein_5451	1665
ATG3_10	Monosiga brevicollis	949	XP_001748852.1	1665
ATG3_10	Mortierella verticillata	950	KFH70377.1	3698
ATG3_10	Mortierella verticillata	951	KFH71722.1	1665
ATG3_10	Naegleria gruberi	952	XP_002674391.1	1665
ATG3_10	Neocallimastix californiae	953	ORY29600.1	1665
ATG3_10	Neocallimastix californiae	954	ORY69242.1	3698
ATG3_10	Neocallimastix californiae	955	ORY72292.1	1665
ATG3_10	Ostreococcus tauri	956	XP_003079897.2	3698
ATG3_10	Ostreococcus tauri	957	XP_022839285.1	1665
ATG3_10	Paramecium tetraurelia	958	XP_001429547.1	1665
ATG3_10	Paramecium tetraurelia	959	XP_001438339.1	1665
ATG3_10	Paramecium tetraurelia	960	XP_001451805.1	1665
ATG3_10	Phaeodactylum tricornutum	961	XP_002176659.1	1665
ATG3_10	Phytophthora capsici	962	jgi_[Phytophthora_capsici]_508749|fgenesh2_kg.PHYCAscaffold_38_#_1_#_Contig2150.1	1665
ATG3_10	Phytophthora capsici	963	jgi_[Phytophthora_capsici]_97167|e_gw1.1.1470.1	3698
ATG3_10	Plasmodium falciparum	964	XP_002808915.1	1665
ATG3_10	Plasmodium falciparum	965	XP_024329011.1	1665
ATG3_10	Saccharomyces cerevisiae	966	NP_013058.1	not used
ATG3_10	Saccharomyces cerevisiae	967	NP_014404.3	1665
ATG3_10	Salpingoeca rosetta	968	XP_004995072.1	not used
ATG3_10	Salpingoeca rosetta	969	XP_004998298.1	1665
ATG3_10	Symbiodinium minutum	970	1000243773	1665
ATG3_10	Sphaeroforma arctica	971	XP_014153986.1	1665
ATG3_10	Sphaeroforma arctica	972	XP_014156071.1	3698
ATG3_10	Spizellomyces punctatus	973	XP_016612256.1	3698
ATG3_10	Spizellomyces punctatus	974	XP_016609591.1	1665
ATG3_10	Stentor coeruleus	975	OMJ75582.1	1665
ATG3_10	Stentor coeruleus	976	OMJ82106.1	1665
ATG3_10	Stentor coeruleus	977	OMJ83902.1	3698
ATG3_10	Stentor coeruleus	978	OMJ89921.1	1665
ATG3_10	Stylonychia lemnae	979	CDW76010.1	1665
ATG3_10	Tetrahymena thermophila	980	XP_001010261.1	1665
ATG3_10	Tetrahymena thermophila	981	XP_001008278.2	1665
ATG3_10	Tetrahymena thermophila	982	XP_001030780.2	not used
ATG3_10	Thalassiosira pseudonana	983	XP_002295882.1	1665
ATG3_10	Thecamonas trahens	984	1000101182	1665
ATG3_10	Thecamonas trahens	985	1000098964	852
ATG3_10	Toxoplasma gondii	986	XP_002368996.1	1665
ATG3_10	Trichomonas vaginalis	987	XP_001312028.1	3698
ATG3_10	Trichomonas vaginalis	988	XP_001328979.1	1665
ATG3_10	Tritrichomonas foetus	989	OHS99236.1	1665
ATG3_10	Trypanosoma brucei	990	XP_011771640.1	1665
ATG3_10	Trypanosoma cruzi	991	XP_807890.1	11440
ATG3_10	Trypanosoma cruzi	992	XP_811761.1	1665
ATG3_10	Trypanosoma cruzi	993	XP_813205.1	11440
ATG3_10	Trypanosoma cruzi	994	XP_813636.1	1665
ATG3_10	Ustilago maydis	995	XP_011386114.1	1665
ATG3_10	Ustilago maydis	996	XP_011391388.1	3698
ATG3_10	Vitrella brassicaformis	997	CEM25812.1	1665
ATG3_10	Volvox carteri	998	XP_002952517.1	1665
ATG3_10	Pseudo-nitzschia multiseries	999	1000217497	7907
ATG4	Acanthamoeba castellanii	1000	XP_004334148.1	4313
ATG4	Acanthamoeba castellanii	1001	XP_004341221.1	4313
ATG4	Allomyces macrogynus	1002	KNE54675.1	4313
ATG4	Allomyces macrogynus	1003	KNE54829.1	4313
ATG4	Allomyces macrogynus	1004	KNE56325.1	4313
ATG4	Allomyces macrogynus	1005	KNE56479.1	4313
ATG4	Aureococcus anophagefferens	1006	XP_009038807.1	4313
ATG4	Babesia microti	1007	XP_021337321.1	4313
ATG4	Bigelowiella natans	1008	1000114947	4313
ATG4	Bodo saltans	1009	CUG94405.1	4313
ATG4	Bodo saltans	1010	CUG94009.1	4313
ATG4	Bremia lactucae	1011	TDH67082.1	4313
ATG4	Candida albicans	1012	XP_713234.2	4313
ATG4	Capsaspora owczarzaki	1013	XP_004364377.1	4313
ATG4	Capsaspora owczarzaki	1014	XP_004363659.2	4313
ATG4	Chlamydomonas reinhardtii	1015	XP_001691049.1	4313
ATG4	Chlorella variabilis	1016	XP_005849097.1	not used
ATG4	Chlorella variabilis	1017	XP_005849098.1	4313
ATG4	Coccomyxa subellipsoidea	1018	XP_005651667.1	4313
ATG4	Cryptosporidium parvum	1019	XP_626849.1	4313
ATG4	Dictyostelium discoideum	1020	EAL65643.1	4313
ATG4	Dictyostelium discoideum	1021	EAL70676.1	4313
ATG4	Ectocarpus siliculosus	1022	CBJ33424.1	4313
ATG4	Emiliania huxleyi	1023	XP_005781094.1	4313
ATG4	Emiliania huxleyi	1024	XP_005787903.1	4313
ATG4	Entamoeba histolytica	1025	XP_651386.1	4313
ATG4	Entamoeba histolytica	1026	XP_656724.1	4313
ATG4	Entamoeba histolytica	1027	XP_653798.2	4313
ATG4	Entamoeba histolytica	1028	XP_001913481.1	4313
ATG4	Entamoeba histolytica	1029	XP_652043.2	4313
ATG4	Euglena gracilis	1030	[Euglena_gracilis]_transcript_3166	4313
ATG4	Euglena gracilis	1031	[Euglena_gracilis]_transcript_15561	4313
ATG4	Euglena gracilis	1032	[Euglena_gracilis]_transcript_22550	4313
ATG4	Euglena gracilis	1033	[Euglena_gracilis]_transcript_27978	4313
ATG4	Fistulifera solaris	1034	GAX28432.1	4313
ATG4	Fistulifera solaris	1035	GAX19397.1	4313
ATG4	Guillardia theta	1036	XP_005826417.1	4313
ATG4	Guillardia theta	1037	XP_005840274.1	4313
ATG4	Heterostelium album	1038	XP_020436555.1	4313
ATG4	Heterostelium album	1039	XP_020434734.1	4313
ATG4	Ichthyophthirius multifiliis	1040	XP_004024384.1	4313
ATG4	Ichthyophthirius multifiliis	1041	XP_004039304.1	4313
ATG4	Ichthyophthirius multifiliis	1042	XP_004039496.1	4313
ATG4	Leishmania donovani	1043	XP_003862742.1	4313
ATG4	Leishmania donovani	1044	XP_003863815.1	4313
ATG4	Leishmania major	1045	XP_001684616.1	4313
ATG4	Leishmania major	1046	XP_001685715.1	4313
ATG4	Mastigamoeba balamuthi	1047	[Mastigamoeba_balamuthi]_m.9541_g.9541_ORF_g.9541_m.9541_comp9853_c0_seq3:31-1545(-)	4313
ATG4	Monocercomonoides exilis	1048	[Monocercomonoides_sp.]_predicted_protein_1257	4313
ATG4	Monocercomonoides exilis	1049	[Monocercomonoides_sp.]_predicted_protein_1692	4313
ATG4	Monocercomonoides exilis	1050	[Monocercomonoides_sp.]_predicted_protein_3027	4313
ATG4	Monocercomonoides exilis	1051	[Monocercomonoides_sp.]_predicted_protein_4216	4313
ATG4	Monocercomonoides exilis	1052	[Monocercomonoides_sp.]_predicted_protein_4766	4313
ATG4	Monocercomonoides exilis	1053	[Monocercomonoides_sp.]_predicted_protein_5427	4313
ATG4	Monocercomonoides exilis	1054	[Monocercomonoides_sp.]_predicted_protein_5740	4313
ATG4	Monocercomonoides exilis	1055	[Monocercomonoides_sp.]_predicted_protein_6887	4313
ATG4	Monocercomonoides exilis	1056	[Monocercomonoides_sp.]_predicted_protein_10838	not used
ATG4	Monocercomonoides exilis	1057	[Monocercomonoides_sp.]_predicted_protein_11018	4313
ATG4	Monocercomonoides exilis	1058	[Monocercomonoides_sp.]_predicted_protein_12507	4313
ATG4	Monocercomonoides exilis	1059	[Monocercomonoides_sp.]_predicted_protein_16821	4313
ATG4	Monosiga brevicollis	1060	XP_001745089.1	4313
ATG4	Monosiga brevicollis	1061	XP_001747503.1	4313
ATG4	Mortierella verticillata	1062	KFH68086.1	4313
ATG4	Mortierella verticillata	1063	KFH70732.1	4313
ATG4	Nannochloropsis gaditana	1064	CBJ33424.1	4313
ATG4	Nannochloropsis gaditana	1065	EWM24746.1	4313
ATG4	Neocallimastix californiae	1066	ORY27817.1	4313
ATG4	Neocallimastix californiae	1067	ORY63708.1	4313
ATG4	Ostreococcus tauri	1068	XP_022838668.1	4313
ATG4	Paramecium tetraurelia	1069	XP_001423152.1	4313
ATG4	Paramecium tetraurelia	1070	XP_001426562.1	4313
ATG4	Paramecium tetraurelia	1071	XP_001436002.1	4313
ATG4	Paramecium tetraurelia	1072	XP_001436300.1	4313
ATG4	Paramecium tetraurelia	1073	XP_001439681.1	4313
ATG4	Paramecium tetraurelia	1074	XP_001441091.1	4313
ATG4	Paramecium tetraurelia	1075	XP_001446691.1	4313
ATG4	Paramecium tetraurelia	1076	XP_001449138.1	4313
ATG4	Paramecium tetraurelia	1077	XP_001460504.1	4313
ATG4	Paramecium tetraurelia	1078	XP_001462308.1	4313
ATG4	Phaeodactylum tricornutum	1079	XP_002185127.1	4313
ATG4	Phytophthora capsici	1080	jgi_[Phytophthora_capsici]_561514|estExt2_Genewise1.C_PHYCAscaffold_70281	4313
ATG4	Plasmodium falciparum	1081	XP_001348344.1	4313
ATG4	Pseudo-nitzschia multiseries	1082	1000209990	4313
ATG4	Reticulomyxa filosa	1083	ETO04670.1	4313
ATG4	Reticulomyxa filosa	1084	ETO18349.1	4313
ATG4	Reticulomyxa filosa	1085	ETO28410.1	4313
ATG4	Reticulomyxa filosa	1086	ETO35543.1	4313
ATG4	Saccharomyces cerevisiae	1087	NP_014176.2	4313
ATG4	Salpingoeca rosetta	1088	XP_004991632.1	4313
ATG4	Symbiodinium minutum	1089	1000245839	4313
ATG4	Sphaeroforma arctica	1090	XP_014146387.1	4313
ATG4	Sphaeroforma arctica	1091	XP_014147996.1	4313
ATG4	Sphaeroforma arctica	1092	XP_014151828.1	not used
ATG4	Spizellomyces punctatus	1093	XP_016605096.1	4313
ATG4	Stentor coeruleus	1094	OMJ67647.1	4313
ATG4	Stentor coeruleus	1095	OMJ67678.1	4313
ATG4	Stentor coeruleus	1096	OMJ70204.1	4313
ATG4	Stentor coeruleus	1097	OMJ73849.1	4313
ATG4	Stentor coeruleus	1098	OMJ90812.1	4313
ATG4	Stentor coeruleus	1099	OMJ95099.1	4313
ATG4	Stylonychia lemnae	1100	CDW79449.1	4313
ATG4	Stylonychia lemnae	1101	CDW77084.1	4313
ATG4	Stylonychia lemnae	1102	CDW71601.1	4313
ATG4	Tetrahymena thermophila	1103	XP_001022513.1	4313
ATG4	Tetrahymena thermophila	1104	XP_001008187.2	4313
ATG4	Tetrahymena thermophila	1105	XP_001008186.2	4313
ATG4	Tetrahymena thermophila	1106	XP_001022514.2	4313
ATG4	Tetrahymena thermophila	1107	XP_001028038.2	4313
ATG4	Thalassiosira pseudonana	1108	XP_002294341.1	4313
ATG4	Thecamonas trahens	1109	1000101969	4313
ATG4	Thecamonas trahens	1110	1000099799	4313
ATG4	Toxoplasma gondii	1111	XP_018637250.1	4313
ATG4	Trichomonas vaginalis	1112	XP_001301012.1	4313
ATG4	Trichomonas vaginalis	1113	XP_001303004.1	4313
ATG4	Trichomonas vaginalis	1114	XP_001323022.1	4313
ATG4	Trichomonas vaginalis	1115	XP_001327207.1	4313
ATG4	Trichomonas vaginalis	1116	XP_001582989.1	4313
ATG4	Tritrichomonas foetus	1117	OHT01447.1	4313
ATG4	Tritrichomonas foetus	1118	OHT03941.1	4313
ATG4	Tritrichomonas foetus	1119	OHT06355.1	4313
ATG4	Tritrichomonas foetus	1120	OHT08429.1	4313
ATG4	Tritrichomonas foetus	1121	OHT17138.1	4313
ATG4	Trypanosoma brucei	1122	XP_011773945.1	4313
ATG4	Trypanosoma brucei	1123	XP_011780973.1	4313
ATG4	Trypanosoma cruzi	1124	XP_806004.1	4313
ATG4	Trypanosoma cruzi	1125	XP_809652.1	4313
ATG4	Trypanosoma cruzi	1126	XP_813094.1	4313
ATG4	Ustilago maydis	1127	XP_011388203.1	4313
ATG4	Vitrella brassicaformis	1128	CEM25538.1	4313
ATG4	Vitrella brassicaformis	1129	CEM20060.1	4313
ATG4	Volvox carteri	1130	XP_002948308.1	4313
ATG5	Allomyces macrogynus	1131	KNE62000.1	2098
ATG5	Allomyces macrogynus	1132	KNE62998.1	2098
ATG5	Bigelowiella natans	1133	1000114336	2098
ATG5	Bodo saltans	1134	CUG60003.1	2098
ATG5	Bodo saltans	1135	CUG55202.1	not used
ATG5	Bodo saltans	1136	CUF08454.1	not used
ATG5	Bremia lactucae	1137	TDH67516.1	2098
ATG5	Candida albicans	1138	XP_713771.2	2098
ATG5	Capsaspora owczarzaki	1139	XP_004348117.1	2098
ATG5	Chlamydomonas reinhardtii	1140	XP_001692662.1	2098
ATG5	Chlorella variabilis	1141	XP_005851475.1	2098
ATG5	Coccomyxa subellipsoidea	1142	XP_005646517.1	2098
ATG5	Cyanophora paradoxa	1143	1000179934	not used
ATG5	Cyanophora paradoxa	1144	1000181400	2098
ATG5	Dictyostelium discoideum	1145	EAL62453.1	2098
ATG5	Ectocarpus siliculosus	1146	CBJ49211.1	2098
ATG5	Emiliania huxleyi	1147	XP_005757248.1	2098
ATG5	Emiliania huxleyi	1148	XP_005785590.1	2098
ATG5	Entamoeba histolytica	1149	XP_653482.1	2098
ATG5	Euglena gracilis	1150	[Euglena_gracilis]_transcript_16403	2098
ATG5	Euglena gracilis	1151	[Euglena_gracilis]_transcript_41548	not used
ATG5	Fistulifera solaris	1152	GAX12007.1	2098
ATG5	Guillardia theta	1153	XP_005835979.1	2098
ATG5	Heterostelium album	1154	XP_020434533.1	2098
ATG5	Mastigamoeba balamuthi	1155	[Mastigamoeba_balamuthi]_m.15395_g.15395_ORF_g.15395_m.15395_comp19960_c1_seq1:154-933(-)	2098
ATG5	Micromonas pusilla	1156	XP_003064603.1	2098
ATG5	Monocercomonoides exilis	1157	[Monocercomonoides_sp.]_predicted_protein_6523	2098
ATG5	Monocercomonoides exilis	1158	[Monocercomonoides_sp.]_predicted_protein_9929	2098
ATG5	Monocercomonoides exilis	1159	[Monocercomonoides_sp.]_predicted_protein_10386	2098
ATG5	Monocercomonoides exilis	1160	[Monocercomonoides_sp.]_predicted_protein_10552	2098
ATG5	Monosiga brevicollis	1161	XP_001747184.1	36
ATG5	Mortierella verticillata	1162	KFH70731.1	2098
ATG5	Naegleria gruberi	1163	XP_002680539.1	2098
ATG5	Neocallimastix californiae	1164	ORY81151.1	2098
ATG5	Ostreococcus tauri	1165	XP_003084193.2	not used
ATG5	Paramecium tetraurelia	1166	XP_001439074.1	2098
ATG5	Paramecium tetraurelia	1167	XP_001445127.1	2098
ATG5	Phaeodactylum tricornutum	1168	XP_002186339.1	2098
ATG5	Phytophthora capsici	1169	jgi_[Phytophthora_capsici]_118572|e_gw1.36.296.1	2098
ATG5	Plasmodium falciparum	1170	XP_001348457.1	2098
ATG5	Reticulomyxa filosa	1171	ETO18993.1	2098
ATG5	Saccharomyces cerevisiae	1172	NP_015176.1	2098
ATG5	Salpingoeca rosetta	1173	XP_004987834.1	2098
ATG5	Symbiodinium minutum	1174	1000231561	2098
ATG5	Sphaeroforma arctica	1175	XP_014150569.1	2098
ATG5	Spizellomyces punctatus	1176	XP_016603956.1	2098
ATG5	Stentor coeruleus	1177	OMJ80158.1	2098
ATG5	Stentor coeruleus	1178	OMJ83423.1	2098
ATG5	Stylonychia lemnae	1179	CDW78612.1	2098
ATG5	Tetrahymena thermophila	1180	XP_001023196.1	2098
ATG5	Thecamonas trahens	1181	1000102890	2098
ATG5	Toxoplasma gondii	1182	XP_002367987.1	2098
ATG5	Trichomonas vaginalis	1183	XP_001319789.1	not used
ATG5	Tritrichomonas foetus	1184	OHT07224.1	2098
ATG5	Ustilago maydis	1185	XP_011388878.1	2098
ATG5	Vitrella brassicaformis	1186	CEM35874.1	2098
ATG5	Pseudo-nitzschia multiseries	1187	1000217042	2098
ATG7	Acanthamoeba castellanii	1188	XP_004349643.1	5883
ATG7	Allomyces macrogynus	1189	KNE55926.1	5883
ATG7	Allomyces macrogynus	1190	KNE58732.1	5883
ATG7	Aureococcus anophagefferens	1191	XP_009037157.1	5883
ATG7	Babesia microti	1192	XP_021338447.1	5883
ATG7	Bigelowiella natans	1193	1000116906	5883
ATG7	Bodo saltans	1194	CUG85182.1	5883
ATG7	Bremia lactucae	1195	TDH71472.1	5883
ATG7	Candida albicans	1196	XP_711780.2	5883
ATG7	Capsaspora owczarzaki	1197	XP_004364215.1	5883
ATG7	Chlamydomonas reinhardtii	1198	XP_001703365.1	5883
ATG7	Chlorella variabilis	1199	XP_005844102.1	5883
ATG7	Coccomyxa subellipsoidea	1200	XP_005648326.1	5883
ATG7	Cyanophora paradoxa	1201	1000175153	5883
ATG7	Dictyostelium discoideum	1202	EAL71880.1	5883
ATG7	Ectocarpus siliculosus	1203	CBJ30234.1	5883
ATG7	Emiliania huxleyi	1204	XP_005789984.1	5883
ATG7	Entamoeba histolytica	1205	XP_654007.1	5883
ATG7	Euglena gracilis	1206	[Euglena_gracilis]_transcript_6429	5883
ATG7	Euglena gracilis	1207	[Euglena_gracilis]_transcript_27041	5883
ATG7	Fistulifera solaris	1208	GAX26119.1	5883
ATG7	Fistulifera solaris	1209	GAX11055.1	5883
ATG7	Guillardia theta	1210	XP_005834743.1	5883
ATG7	Heterostelium album	1211	XP_020436587.1	5883
ATG7	Leishmania donovani	1212	XP_003858443.1	5883
ATG7	Leishmania major	1213	XP_001680904.1	5883
ATG7	Mastigamoeba balamuthi	1214	[Mastigamoeba_balamuthi]_m.13207_g.13207_ORF_g.13207_m.13207_comp15471_c0_seq1:1-1671(-)	5883
ATG7	Micromonas pusilla	1215	XP_003060175.1	5883
ATG7	Monocercomonoides exilis	1216	[Monocercomonoides_sp.]_predicted_protein_5372	5883
ATG7	Mortierella verticillata	1217	KFH65025.1	5883
ATG7	Naegleria gruberi	1218	XP_002676986.1	5883
ATG7	Nannochloropsis gaditana	1219	EWM26809.1	5883
ATG7	Nannochloropsis gaditana	1220	CBJ30234.1	5883
ATG7	Nannochloropsis gaditana	1221	EWM26809.1	5883
ATG7	Neocallimastix californiae	1222	ORY60493.1	5883
ATG7	Ostreococcus tauri	1223	XP_003079963.2	5883
ATG7	Paramecium tetraurelia	1224	XP_001452977.1	5883
ATG7	Phytophthora capsici	1225	jgi_[Phytophthora_capsici]_508772|fgenesh2_kg.PHYCAscaffold_38_#_24_#_4097309:1	5883
ATG7	Plasmodium falciparum	1226	XP_001347942.1	5883
ATG7	Reticulomyxa filosa	1227	ETO27249.1	5883
ATG7	Reticulomyxa filosa	1228	ETO29085.1	5883
ATG7	Saccharomyces cerevisiae	1229	NP_012041.1	5883
ATG7	Salpingoeca rosetta	1230	XP_004995589.1	5883
ATG7	Symbiodinium minutum	1231	1000266475	8122
ATG7	Sphaeroforma arctica	1232	XP_014144448.1	5883
ATG7	Sphaeroforma arctica	1233	XP_014155749.1	5883
ATG7	Spizellomyces punctatus	1234	XP_016611698.1	5883
ATG7	Stentor coeruleus	1235	OMJ89555.1	5883
ATG7	Stylonychia lemnae	1236	CDW71187.1	5883
ATG7	Tetrahymena thermophila	1237	XP_001019819.2	5883
ATG7	Thalassiosira pseudonana	1238	XP_002289307.1	5883
ATG7	Thecamonas trahens	1239	1000097763	5883
ATG7	Toxoplasma gondii	1240	XP_002367903.1	5883
ATG7	Trichomonas vaginalis	1241	XP_001312121.1	5883
ATG7	Tritrichomonas foetus	1242	OHS96604.1	5883
ATG7	Trypanosoma brucei	1243	XP_011778518.1	5883
ATG7	Trypanosoma cruzi	1244	XP_810156.1	5883
ATG7	Trypanosoma cruzi	1245	XP_819861.1	5883
ATG7	Ustilago maydis	1246	XP_011391717.1	5883
ATG7	Vitrella brassicaformis	1247	CEL92350.1	5883
ATG7	Volvox carteri	1248	XP_002951753.1	5883
ATG8	Acanthamoeba castellanii	1249	XP_004336958.1	1783
ATG8	Allomyces macrogynus	1250	KNE70016.1	1783
ATG8	Allomyces macrogynus	1251	KNE71069.1	1783
ATG8	Aureococcus anophagefferens	1252	XP_009040191.1	1783
ATG8	Babesia microti	1253	XP_012649241.1	1783
ATG8	Bigelowiella natans	1254	1000121674	1783
ATG8	Bodo saltans	1255	CUG86839.1	1783
ATG8	Bremia lactucae	1256	TDH64780.1	1783
ATG8	Candida albicans	1257	XP_019330653.1	1783
ATG8	Capsaspora owczarzaki	1258	XP_004343574.1	1783
ATG8	Chlamydomonas reinhardtii	1259	XP_001699190.1	1783
ATG8	Chlorella variabilis	1260	XP_005844207.1	1783
ATG8	Coccomyxa subellipsoidea	1261	XP_005651077.1	1783
ATG8	Cyanophora paradoxa	1262	1000167923	1783
ATG8	Cryptosporidium parvum	1263	XP_001388400.1	1783
ATG8	Dictyostelium discoideum	1264	EAL62106.1	1783
ATG8	Dictyostelium discoideum	1265	EAL64271.1	1783
ATG8	Ectocarpus siliculosus	1266	CBJ33449.1	1783
ATG8	Emiliania huxleyi	1267	XP_005762393.1	1783
ATG8	Emiliania huxleyi	1268	XP_005762394.1	1783
ATG8	Emiliania huxleyi	1269	XP_005769548.1	1783
ATG8	Emiliania huxleyi	1270	XP_005791457.1	1783
ATG8	Entamoeba histolytica	1271	XP_649165.1	1783
ATG8	Entamoeba histolytica	1272	XP_649940.1	1783
ATG8	Euglena gracilis	1273	[Euglena_gracilis]_transcript_1588	1783
ATG8	Euglena gracilis	1274	[Euglena_gracilis]_transcript_4347	1783
ATG8	Euglena gracilis	1275	[Euglena_gracilis]_transcript_6495	1783
ATG8	Euglena gracilis	1276	[Euglena_gracilis]_transcript_11389	1783
ATG8	Fistulifera solaris	1277	GAX28527.1	1783
ATG8	Guillardia theta	1278	XP_005817795.1	1783
ATG8	Guillardia theta	1279	XP_005827281.1	1783
ATG8	Heterostelium album	1280	XP_020431198.1	1783
ATG8	Leishmania donovani	1281	XP_003858697.1	7352
ATG8	Leishmania donovani	1282	XP_003860261.1	7352
ATG8	Leishmania donovani	1283	XP_003860859.1	1783
ATG8	Leishmania major	1284	XP_001681186.1	not used
ATG8	Leishmania major	1285	XP_001681179.1	not used
ATG8	Leishmania major	1286	XP_001681188.1	not used
ATG8	Leishmania major	1287	XP_001681185.1	not used
ATG8	Leishmania major	1288	XP_001681189.1	not used
ATG8	Leishmania major	1289	XP_001682665.1	7352
ATG8	Leishmania major	1290	XP_001682664.1	7352
ATG8	Leishmania major	1291	XP_001682668.1	7352
ATG8	Leishmania major	1292	XP_001682672.1	7352
ATG8	Leishmania major	1293	XP_001682673.1	7352
ATG8	Leishmania major	1294	XP_001682752.1	1783
ATG8	Leishmania major	1295	XP_001683281.1	1783
ATG8	Micromonas pusilla	1296	XP_003063071.1	1783
ATG8	Monocercomonoides exilis	1297	[Monocercomonoides_sp.]_predicted_protein_2480	1783
ATG8	Monocercomonoides exilis	1298	[Monocercomonoides_sp.]_predicted_protein_9458	1783
ATG8	Monocercomonoides exilis	1299	[Monocercomonoides_sp.]_predicted_protein_13133	1783
ATG8	Monosiga brevicollis	1300	XP_001746155.1	1783
ATG8	Monosiga brevicollis	1301	XP_001748106.1	1783
ATG8	Mortierella verticillata	1302	KFH62237.1	1783
ATG8	Mortierella verticillata	1303	KFH62238.1	1783
ATG8	Mortierella verticillata	1304	KFH74234.1	1783
ATG8	Naegleria gruberi	1305	XP_002674982.1	1783
ATG8	Naegleria gruberi	1306	XP_002678928.1	1783
ATG8	Nannochloropsis gaditana	1307	EWM23068.1	1783
ATG8	Neocallimastix californiae	1308	ORY13000.1	1783
ATG8	Neocallimastix californiae	1309	ORY23604.1	1783
ATG8	Neocallimastix californiae	1310	ORY37347.1	1783
ATG8	Neocallimastix californiae	1311	ORY72650.1	1783
ATG8	Ostreococcus tauri	1312	XP_022838346.1	1783
ATG8	Paramecium tetraurelia	1313	XP_001424205.1	1783
ATG8	Paramecium tetraurelia	1314	XP_001424772.1	1783
ATG8	Paramecium tetraurelia	1315	XP_001425825.1	not used
ATG8	Paramecium tetraurelia	1316	XP_001425867.1	not used
ATG8	Paramecium tetraurelia	1317	XP_001426466.1	1783
ATG8	Paramecium tetraurelia	1318	XP_001429025.1	1783
ATG8	Paramecium tetraurelia	1319	XP_001431373.1	1783
ATG8	Paramecium tetraurelia	1320	XP_001436088.1	1783
ATG8	Paramecium tetraurelia	1321	XP_001436686.1	not used
ATG8	Paramecium tetraurelia	1322	XP_001437088.1	not used
ATG8	Paramecium tetraurelia	1323	XP_001437540.1	1783
ATG8	Paramecium tetraurelia	1324	XP_001440855.1	not used
ATG8	Paramecium tetraurelia	1325	XP_001442507.1	1783
ATG8	Paramecium tetraurelia	1326	XP_001442642.1	1783
ATG8	Paramecium tetraurelia	1327	XP_001442904.1	not used
ATG8	Paramecium tetraurelia	1328	XP_001447643.1	1783
ATG8	Paramecium tetraurelia	1329	XP_001448343.1	1783
ATG8	Paramecium tetraurelia	1330	XP_001448598.1	not used
ATG8	Paramecium tetraurelia	1331	XP_001451354.1	1783
ATG8	Paramecium tetraurelia	1332	XP_001452596.1	1783
ATG8	Paramecium tetraurelia	1333	XP_001452724.1	1783
ATG8	Paramecium tetraurelia	1334	XP_001454579.1	not used
ATG8	Paramecium tetraurelia	1335	XP_001456959.1	1783
ATG8	Paramecium tetraurelia	1336	XP_001459872.1	not used
ATG8	Paramecium tetraurelia	1337	XP_001461813.1	not used
ATG8	Phaeodactylum tricornutum	1338	XP_002185239.1	1783
ATG8	Plasmodium falciparum	1339	XP_001347478.1	1783
ATG8	Pseudo-nitzschia multiseries	1340	1000212243	1783
ATG8	Reticulomyxa filosa	1341	ETO30718.1	1783
ATG8	Saccharomyces cerevisiae	1342	NP_009475.1	1783
ATG8	Salpingoeca rosetta	1343	XP_004995668.1	1783
ATG8	Symbiodinium minutum	1344	1000230446	7253
ATG8	Symbiodinium minutum	1345	1000241332	1783
ATG8	Symbiodinium minutum	1346	1000241333	1783
ATG8	Symbiodinium minutum	1347	1000251617	1783
ATG8	Symbiodinium minutum	1348	1000266904	1783
ATG8	Sphaeroforma arctica	1349	XP_014160249.1	1783
ATG8	Spizellomyces punctatus	1350	XP_016612424.1	1783
ATG8	Stentor coeruleus	1351	OMJ66386.1	1783
ATG8	Stentor coeruleus	1352	OMJ69837.1	1783
ATG8	Stentor coeruleus	1353	OMJ71511.1	1783
ATG8	Stentor coeruleus	1354	OMJ76729.1	1783
ATG8	Stentor coeruleus	1355	OMJ77192.1	1783
ATG8	Stentor coeruleus	1356	OMJ80015.1	1783
ATG8	Stentor coeruleus	1357	OMJ83183.1	1783
ATG8	Stentor coeruleus	1358	OMJ84616.1	1783
ATG8	Stylonychia lemnae	1359	CDW88108.1	1783
ATG8	Stylonychia lemnae	1360	CDW87988.1	21363
ATG8	Stylonychia lemnae	1361	CDW83981.1	1783
ATG8	Stylonychia lemnae	1362	CDW79341.1	1783
ATG8	Stylonychia lemnae	1363	CDW74534.1	1783
ATG8	Stylonychia lemnae	1364	CDW72592.1	1783
ATG8	Tetrahymena thermophila	1365	XP_977147.1	1783
ATG8	Tetrahymena thermophila	1366	XP_001014427.1	1783
ATG8	Tetrahymena thermophila	1367	XP_001028047.1	1783
ATG8	Tetrahymena thermophila	1368	XP_001022253.2	21363
ATG8	Tetrahymena thermophila	1369	XP_012656086.1	1783
ATG8	Thalassiosira pseudonana	1370	XP_002287173.1	1783
ATG8	Thecamonas trahens	1371	1000097882	1783
ATG8	Toxoplasma gondii	1372	XP_002369466.1	1783
ATG8	Trichomonas vaginalis	1373	XP_001320843.1	1783
ATG8	Trichomonas vaginalis	1374	XP_001321184.1	1783
ATG8	Trypanosoma brucei	1375	XP_011774707.1	1783
ATG8	Trypanosoma brucei	1376	XP_011775076.1	1783
ATG8	Trypanosoma brucei	1377	XP_011775078.1	1783
ATG8	Trypanosoma cruzi	1378	XP_816747.1	1783
ATG8	Trypanosoma cruzi	1379	XP_818282.1	1783
ATG8	Trypanosoma cruzi	1380	XP_818912.1	1783
ATG8	Ustilago maydis	1381	XP_011391873.1	1783
ATG8	Vitrella brassicaformis	1382	CEM13337.1	1783
ATG8	Vitrella brassicaformis	1383	CEM09644.1	1783
ATG8	Volvox carteri	1384	XP_002952089.1	1783
ATG8	Phytophthora capsici	1385	jgi_[Phytophthora_capsici]_507400|fgenesh2_kg.PHYCAscaffold_27_#_74_#_gi|189083900|gb|BT031416.1|	1783
BAX_INHIBITOR	Acanthamoeba castellanii	1386	XP_004338585.1	12770
BAX_INHIBITOR	Acanthamoeba castellanii	1387	XP_004342510.1	12769
BAX_INHIBITOR	Acanthamoeba castellanii	1388	XP_004353221.1	12769
BAX_INHIBITOR	Allomyces macrogynus	1389	KNE57344.1	12769
BAX_INHIBITOR	Allomyces macrogynus	1390	KNE66079.1	12769
BAX_INHIBITOR	Aureococcus anophagefferens	1391	XP_009037860.1	12770
BAX_INHIBITOR	Aureococcus anophagefferens	1392	XP_009043466.1	12770
BAX_INHIBITOR	Babesia microti	1393	XP_012649507.1	12770
BAX_INHIBITOR	Babesia microti	1394	XP_012650060.1	12769
BAX_INHIBITOR	Blastocystis hominis	1395	XP_012894899.1	12770
BAX_INHIBITOR	Blastocystis hominis	1396	XP_012896162.1	12770
BAX_INHIBITOR	Blastocystis hominis	1397	XP_012897730.1	12770
BAX_INHIBITOR	Bigelowiella natans	1398	1000107389	12770
BAX_INHIBITOR	Bigelowiella natans	1399	1000110977	12769
BAX_INHIBITOR	Bigelowiella natans	1400	1000127532	12769
BAX_INHIBITOR	Bremia lactucae	1401	TDH66846.1	12769
BAX_INHIBITOR	Candida albicans	1402	XP_710035.2	12770
BAX_INHIBITOR	Capsaspora owczarzaki	1403	XP_004345566.1	12770
BAX_INHIBITOR	Capsaspora owczarzaki	1404	XP_004346882.1	12769
BAX_INHIBITOR	Chlamydomonas reinhardtii	1405	XP_001690098.1	12770
BAX_INHIBITOR	Chlamydomonas reinhardtii	1406	XP_001696404.1	12770
BAX_INHIBITOR	Chlamydomonas reinhardtii	1407	XP_001700193.1	12769
BAX_INHIBITOR	Chlorella variabilis	1408	XP_005846644.1	12769
BAX_INHIBITOR	Chlorella variabilis	1409	XP_005849487.1	12770
BAX_INHIBITOR	Chlorella variabilis	1410	XP_005849730.1	12770
BAX_INHIBITOR	Coccomyxa subellipsoidea	1411	XP_005644742.1	12769
BAX_INHIBITOR	Coccomyxa subellipsoidea	1412	XP_005646352.1	12770
BAX_INHIBITOR	Coccomyxa subellipsoidea	1413	XP_005647458.1	12770
BAX_INHIBITOR	Coccomyxa subellipsoidea	1414	XP_005647852.1	12770
BAX_INHIBITOR	Cyanophora paradoxa	1415	1000163891	12770
BAX_INHIBITOR	Cyanophora paradoxa	1416	1000184439	12769
BAX_INHIBITOR	Cryptosporidium parvum	1417	XP_625854.1	12770
BAX_INHIBITOR	Cryptosporidium parvum	1418	XP_626947.1	12770
BAX_INHIBITOR	Cryptosporidium parvum	1419	XP_627644.1	12769
BAX_INHIBITOR	Cyanidioschyzon merolae	1420	XP_005535398.1	12770
BAX_INHIBITOR	Cyanidioschyzon merolae	1421	XP_005539402.1	12769
BAX_INHIBITOR	Dictyostelium discoideum	1422	EAL63617.1	12769
BAX_INHIBITOR	Dictyostelium discoideum	1423	EAL64631.1	12769
BAX_INHIBITOR	Dictyostelium discoideum	1424	EAL69726.1	12769
BAX_INHIBITOR	Ectocarpus siliculosus	1425	CBJ28269.1	12770
BAX_INHIBITOR	Ectocarpus siliculosus	1426	CBN79712.1	12769
BAX_INHIBITOR	Ectocarpus siliculosus	1427	CBN78284.1	12770
BAX_INHIBITOR	Emiliania huxleyi	1428	XP_005759560.1	12770
BAX_INHIBITOR	Emiliania huxleyi	1429	XP_005761881.1	12770
BAX_INHIBITOR	Emiliania huxleyi	1430	XP_005763132.1	12770
BAX_INHIBITOR	Emiliania huxleyi	1431	XP_005778836.1	12770
BAX_INHIBITOR	Emiliania huxleyi	1432	XP_005779505.1	12770
BAX_INHIBITOR	Emiliania huxleyi	1433	XP_005782564.1	12770
BAX_INHIBITOR	Emiliania huxleyi	1434	XP_005782975.1	12770
BAX_INHIBITOR	Emiliania huxleyi	1435	XP_005787842.1	12769
BAX_INHIBITOR	Emiliania huxleyi	1436	XP_005788768.1	12770
BAX_INHIBITOR	Euglena gracilis	1437	[Euglena_gracilis]_transcript_18086	12769
BAX_INHIBITOR	Euglena gracilis	1438	[Euglena_gracilis]_transcript_20380	12770
BAX_INHIBITOR	Euglena gracilis	1439	[Euglena_gracilis]_transcript_21012	12770
BAX_INHIBITOR	Euglena gracilis	1440	[Euglena_gracilis]_transcript_22299	12770
BAX_INHIBITOR	Euglena gracilis	1441	[Euglena_gracilis]_transcript_27172	12770
BAX_INHIBITOR	Euglena gracilis	1442	[Euglena_gracilis]_transcript_29902	12769
BAX_INHIBITOR	Fistulifera solaris	1443	GAX17107.1	12770
BAX_INHIBITOR	Galdieria sulphuraria	1444	XP_005708969.1	12769
BAX_INHIBITOR	Galdieria sulphuraria	1445	XP_005709020.1	12770
BAX_INHIBITOR	Guillardia theta	1446	XP_005827617.1	12770
BAX_INHIBITOR	Guillardia theta	1447	XP_005832770.1	12769
BAX_INHIBITOR	Guillardia theta	1448	XP_005834884.1	12770
BAX_INHIBITOR	Guillardia theta	1449	XP_005834953.1	12769
BAX_INHIBITOR	Guillardia theta	1450	XP_005835091.1	12770
BAX_INHIBITOR	Guillardia theta	1451	XP_005837264.1	12770
BAX_INHIBITOR	Heterostelium album	1452	XP_020433086.1	12769
BAX_INHIBITOR	Ichthyophthirius multifiliis	1453	XP_004024995.1	12770
BAX_INHIBITOR	Ichthyophthirius multifiliis	1454	XP_004030111.1	12770
BAX_INHIBITOR	Ichthyophthirius multifiliis	1455	XP_004031361.1	12770
BAX_INHIBITOR	Ichthyophthirius multifiliis	1456	XP_004031798.1	12770
BAX_INHIBITOR	Ichthyophthirius multifiliis	1457	XP_004034587.1	12770
BAX_INHIBITOR	Ichthyophthirius multifiliis	1458	XP_004039088.1	12770
BAX_INHIBITOR	Ichthyophthirius multifiliis	1459	XP_004039317.1	12769
BAX_INHIBITOR	Leishmania donovani	1460	XP_003861213.1	12769
BAX_INHIBITOR	Leishmania major	1461	XP_001683635.1	12769
BAX_INHIBITOR	Mastigamoeba balamuthi	1462	[Mastigamoeba_balamuthi]_m.27858_g.27858_ORF_g.27858_m.27858_comp49458_c0_seq1:287-1069(+)	12770
BAX_INHIBITOR	Monosiga brevicollis	1463	XP_001746311.1	12770
BAX_INHIBITOR	Monosiga brevicollis	1464	XP_001746413.1	12769
BAX_INHIBITOR	Naegleria gruberi	1465	XP_002675692.1	12769
BAX_INHIBITOR	Naegleria gruberi	1466	XP_002675698.1	12770
BAX_INHIBITOR	Naegleria gruberi	1467	XP_002678530.1	12769
BAX_INHIBITOR	Nannochloropsis gaditana	1468	EWM22610.1	12770
BAX_INHIBITOR	Nannochloropsis gaditana	1469	EWM23688.1	12770
BAX_INHIBITOR	Paramecium tetraurelia	1470	XP_001425391.1	12768
BAX_INHIBITOR	Paramecium tetraurelia	1471	XP_001425408.1	12768
BAX_INHIBITOR	Paramecium tetraurelia	1472	XP_001426363.1	not used
BAX_INHIBITOR	Paramecium tetraurelia	1473	XP_001427923.1	12770
BAX_INHIBITOR	Paramecium tetraurelia	1474	XP_001428308.1	12768
BAX_INHIBITOR	Paramecium tetraurelia	1475	XP_001431388.1	not used
BAX_INHIBITOR	Paramecium tetraurelia	1476	XP_001435236.1	12770
BAX_INHIBITOR	Paramecium tetraurelia	1477	XP_001435914.1	12770
BAX_INHIBITOR	Paramecium tetraurelia	1478	XP_001436401.1	12770
BAX_INHIBITOR	Paramecium tetraurelia	1479	XP_001437187.1	not used
BAX_INHIBITOR	Paramecium tetraurelia	1480	XP_001437222.1	not used
BAX_INHIBITOR	Paramecium tetraurelia	1481	XP_001438239.1	12770
BAX_INHIBITOR	Paramecium tetraurelia	1482	XP_001438543.1	12770
BAX_INHIBITOR	Paramecium tetraurelia	1483	XP_001440276.1	12768
BAX_INHIBITOR	Paramecium tetraurelia	1484	XP_001441976.1	not used
BAX_INHIBITOR	Paramecium tetraurelia	1485	XP_001444377.1	12770
BAX_INHIBITOR	Paramecium tetraurelia	1486	XP_001445319.1	not used
BAX_INHIBITOR	Paramecium tetraurelia	1487	XP_001451249.1	12768
BAX_INHIBITOR	Paramecium tetraurelia	1488	XP_001454147.1	not used
BAX_INHIBITOR	Paramecium tetraurelia	1489	XP_001454322.1	12770
BAX_INHIBITOR	Paramecium tetraurelia	1490	XP_001457064.1	12770
BAX_INHIBITOR	Paramecium tetraurelia	1491	XP_001457872.1	not used
BAX_INHIBITOR	Paramecium tetraurelia	1492	XP_001459566.1	not used
BAX_INHIBITOR	Paramecium tetraurelia	1493	XP_001460499.1	12770
BAX_INHIBITOR	Paramecium tetraurelia	1494	XP_001462320.1	12770
BAX_INHIBITOR	Phaeodactylum tricornutum	1495	XP_002182380.1	12770
BAX_INHIBITOR	Phytophthora capsici	1496	jgi_[Phytophthora_capsici]_102795|e_gw1.7.83.1	12769
BAX_INHIBITOR	Plasmodium falciparum	1497	XP_001350869.1	12770
BAX_INHIBITOR	Plasmodium falciparum	1498	XP_001348745.2	12769
BAX_INHIBITOR	Pseudo-nitzschia multiseries	1499	1000218240	12770
BAX_INHIBITOR	Porphyridium purpureum	1500	1000027255	12769
BAX_INHIBITOR	Porphyridium purpureum	1501	1000033169	12770
BAX_INHIBITOR	Porphyridium purpureum	1502	1000035174	12770
BAX_INHIBITOR	Reticulomyxa filosa	1503	ETO30805.1	12769
BAX_INHIBITOR	Saccharomyces cerevisiae	1504	NP_014094.1	12770
BAX_INHIBITOR	Salpingoeca rosetta	1505	XP_004988085.1	12769
BAX_INHIBITOR	Salpingoeca rosetta	1506	XP_004990681.1	12770
BAX_INHIBITOR	Salpingoeca rosetta	1507	XP_004998408.1	12769
BAX_INHIBITOR	Symbiodinium minutum	1508	1000227511	12770
BAX_INHIBITOR	Symbiodinium minutum	1509	1000230768	12770
BAX_INHIBITOR	Symbiodinium minutum	1510	1000231589	12770
BAX_INHIBITOR	Symbiodinium minutum	1511	1000231590	12770
BAX_INHIBITOR	Symbiodinium minutum	1512	1000242406	12770
BAX_INHIBITOR	Symbiodinium minutum	1513	1000251147	12770
BAX_INHIBITOR	Symbiodinium minutum	1514	1000252722	12770
BAX_INHIBITOR	Symbiodinium minutum	1515	1000256672	12770
BAX_INHIBITOR	Symbiodinium minutum	1516	1000259981	12770
BAX_INHIBITOR	Sphaeroforma arctica	1517	XP_014150838.1	12770
BAX_INHIBITOR	Sphaeroforma arctica	1518	XP_014155106.1	12769
BAX_INHIBITOR	Sphaeroforma arctica	1519	XP_014157080.1	12770
BAX_INHIBITOR	Spizellomyces punctatus	1520	XP_016610106.1	12770
BAX_INHIBITOR	Spizellomyces punctatus	1521	XP_016610572.1	12769
BAX_INHIBITOR	Stentor coeruleus	1522	OMJ65282.1	12769
BAX_INHIBITOR	Stentor coeruleus	1523	OMJ65583.1	not used
BAX_INHIBITOR	Stentor coeruleus	1524	OMJ66631.1	not used
BAX_INHIBITOR	Stentor coeruleus	1525	OMJ67629.1	12770
BAX_INHIBITOR	Stentor coeruleus	1526	OMJ74582.1	not used
BAX_INHIBITOR	Stentor coeruleus	1527	OMJ76564.1	12770
BAX_INHIBITOR	Stentor coeruleus	1528	OMJ76565.1	12770
BAX_INHIBITOR	Stentor coeruleus	1529	OMJ78517.1	not used
BAX_INHIBITOR	Stentor coeruleus	1530	OMJ80062.1	12770
BAX_INHIBITOR	Stentor coeruleus	1531	OMJ80420.1	12770
BAX_INHIBITOR	Stentor coeruleus	1532	OMJ85699.1	12770
BAX_INHIBITOR	Stentor coeruleus	1533	OMJ85912.1	not used
BAX_INHIBITOR	Stentor coeruleus	1534	OMJ86499.1	12770
BAX_INHIBITOR	Stentor coeruleus	1535	OMJ87890.1	12770
BAX_INHIBITOR	Stentor coeruleus	1536	OMJ88766.1	12770
BAX_INHIBITOR	Stentor coeruleus	1537	OMJ91233.1	12770
BAX_INHIBITOR	Stentor coeruleus	1538	OMJ91616.1	not used
BAX_INHIBITOR	Stylonychia lemnae	1539	CDW91632.1	12770
BAX_INHIBITOR	Stylonychia lemnae	1540	CDW91296.1	12770
BAX_INHIBITOR	Stylonychia lemnae	1541	CDW90886.1	12769
BAX_INHIBITOR	Stylonychia lemnae	1542	CDW89640.1	12769
BAX_INHIBITOR	Stylonychia lemnae	1543	CDW87655.1	12769
BAX_INHIBITOR	Stylonychia lemnae	1544	CDW81450.1	12770
BAX_INHIBITOR	Stylonychia lemnae	1545	CDW79893.1	12770
BAX_INHIBITOR	Stylonychia lemnae	1546	CDW79303.1	12770
BAX_INHIBITOR	Stylonychia lemnae	1547	CDW72063.1	12770
BAX_INHIBITOR	Tetrahymena thermophila	1548	XP_977230.1	12770
BAX_INHIBITOR	Tetrahymena thermophila	1549	XP_977269.1	not used
BAX_INHIBITOR	Tetrahymena thermophila	1550	XP_001010451.1	12770
BAX_INHIBITOR	Tetrahymena thermophila	1551	XP_001010452.1	12770
BAX_INHIBITOR	Tetrahymena thermophila	1552	XP_001010649.1	12770
BAX_INHIBITOR	Tetrahymena thermophila	1553	XP_001011011.1	12770
BAX_INHIBITOR	Tetrahymena thermophila	1554	XP_001020280.1	12770
BAX_INHIBITOR	Tetrahymena thermophila	1555	XP_001023586.1	12770
BAX_INHIBITOR	Tetrahymena thermophila	1556	XP_001030072.1	12769
BAX_INHIBITOR	Tetrahymena thermophila	1557	XP_001031693.1	12770
BAX_INHIBITOR	Tetrahymena thermophila	1558	XP_012651479.1	12768
BAX_INHIBITOR	Tetrahymena thermophila	1559	XP_001031000.2	12770
BAX_INHIBITOR	Thalassiosira pseudonana	1560	XP_002293340.1	12770
BAX_INHIBITOR	Thecamonas trahens	1561	1000102802	12770
BAX_INHIBITOR	Thecamonas trahens	1562	1000102071	12769
BAX_INHIBITOR	Thecamonas trahens	1563	1000101917	12769
BAX_INHIBITOR	Toxoplasma gondii	1564	XP_002364898.1	12769
BAX_INHIBITOR	Toxoplasma gondii	1565	XP_002367310.1	12770
BAX_INHIBITOR	Toxoplasma gondii	1566	XP_002367585.1	12770
BAX_INHIBITOR	Toxoplasma gondii	1567	XP_018635610.1	12770
BAX_INHIBITOR	Trypanosoma brucei	1568	XP_011779803.1	12769
BAX_INHIBITOR	Trypanosoma cruzi	1569	XP_807226.1	12769
BAX_INHIBITOR	Trypanosoma cruzi	1570	XP_819777.1	12769
BAX_INHIBITOR	Ustilago maydis	1571	XP_011387029.1	12770
BAX_INHIBITOR	Ustilago maydis	1572	XP_011390871.1	12769
BAX_INHIBITOR	Vitrella brassicaformis	1573	CEM37986.1	12770
BAX_INHIBITOR	Vitrella brassicaformis	1574	CEM34030.1	12770
BAX_INHIBITOR	Vitrella brassicaformis	1575	CEM31494.1	12770
BAX_INHIBITOR	Vitrella brassicaformis	1576	CEM17696.1	12770
BAX_INHIBITOR	Vitrella brassicaformis	1577	CEM04603.1	12770
BAX_INHIBITOR	Vitrella brassicaformis	1578	CEM02369.1	12770
BAX_INHIBITOR	Vitrella brassicaformis	1579	CEL99509.1	12770
BAX_INHIBITOR	Vitrella brassicaformis	1580	CEL97960.1	12770
BAX_INHIBITOR	Vitrella brassicaformis	1581	CEL92687.1	12769
BAX_INHIBITOR	Volvox carteri	1582	XP_002945727.1	12770
BAX_INHIBITOR	Volvox carteri	1583	XP_002948597.1	12769
BAX_INHIBITOR	Volvox carteri	1584	XP_002953917.1	12770
BAX_INHIBITOR	Volvox carteri	1585	XP_002957480.1	12770
BAX_INHIBITOR	Entamoeba histolytica	1586	XP_651203.1	not used
BAX_INHIBITOR	Ostreococcus tauri	1587	1000033169	12770
BAX_INHIBITOR	Saccharomyces cerevisiae	1588	NP_014094.1	12770
BAX_INHIBITOR	Trypanosoma brucei	1589	XP_011779803.1	12769
BAX_INHIBITOR	Arabidopsis_thaliana_1590 *** Blast input ***	1590	NP_199523.1	12769
BECLIN	Allomyces macrogynus	1591	KNE71438.1	3849
BECLIN	Allomyces macrogynus	1592	KNE71439.1	3849
BECLIN	Allomyces macrogynus	1593	KNE72758.1	3849
BECLIN	Aureococcus anophagefferens	1594	XP_009040571.1	3849
BECLIN	Aureococcus anophagefferens	1595	XP_009041089.1	3849
BECLIN	Aureococcus anophagefferens	1596	XP_009042662.1	3849
BECLIN	Blastocystis hominis	1597	XP_012895739.1	3849
BECLIN	Bigelowiella natans	1598	1000122608	3849
BECLIN	Bodo saltans	1599	CUF33234.1	5573
BECLIN	Bremia lactucae	1600	TDH69088.1	3849
BECLIN	Bremia lactucae	1601	TDH70519.1	3849
BECLIN	Candida albicans	1602	XP_720483.2	3849
BECLIN	Capsaspora owczarzaki	1603	XP_004343192.2	3849
BECLIN	Chlamydomonas reinhardtii	1604	XP_001689505.1	3849
BECLIN	Coccomyxa subellipsoidea	1605	XP_005651293.1	3849
BECLIN	Cyanophora paradoxa	1606	1000176169	3849
BECLIN	Cryptosporidium parvum	1607	XP_625362.1	3849
BECLIN	Dictyostelium discoideum	1608	EAL63436.1	3849
BECLIN	Dictyostelium discoideum	1609	EAL71972.1	3849
BECLIN	Ectocarpus siliculosus	1610	CBJ28612.1	3849
BECLIN	Ectocarpus siliculosus	1611	CBJ29009.1	3849
BECLIN	Emiliania huxleyi	1612	XP_005782515.1	3849
BECLIN	Euglena gracilis	1613	[Euglena_gracilis]_transcript_10357	3849
BECLIN	Euglena gracilis	1614	[Euglena_gracilis]_transcript_12507	3849
BECLIN	Fistulifera solaris	1615	GAX28352.1	10899
BECLIN	Fistulifera solaris	1616	GAX25938.1	3849
BECLIN	Fistulifera solaris	1617	GAX24283.1	10899
BECLIN	Guillardia theta	1618	XP_005840418.1	3849
BECLIN	Heterostelium album	1619	XP_020438534.1	3849
BECLIN	Ichthyophthirius multifiliis	1620	XP_004027370.1	3849
BECLIN	Mastigamoeba balamuthi	1621	[Mastigamoeba_balamuthi]_m.20564_g.20564_ORF_g.20564_m.20564_comp30245_c0_seq1:633-2258(-)	3849
BECLIN	Mastigamoeba balamuthi	1622	[Mastigamoeba_balamuthi]_m.28515_g.28515_ORF_g.28515_m.28515_comp52597_c0_seq2:3-1355(+)	3849
BECLIN	Micromonas pusilla	1623	XP_003060474.1	3849
BECLIN	Monocercomonoides exilis	1624	[Monocercomonoides_sp.]_predicted_protein_13014	3849
BECLIN	Monosiga brevicollis	1625	XP_001748523.1	5826
BECLIN	Mortierella verticillata	1626	KFH66745.1	3849
BECLIN	Naegleria gruberi	1627	XP_002670246.1	3849
BECLIN	Naegleria gruberi	1628	XP_002683469.1	3849
BECLIN	Nannochloropsis gaditana	1629	EWM25124.1	3849
BECLIN	Nannochloropsis gaditana	1630	EWM25124.1	3849
BECLIN	Neocallimastix californiae	1631	ORY85183.1	3849
BECLIN	Ostreococcus tauri	1632	XP_003079004.1	3849
BECLIN	Paramecium tetraurelia	1633	XP_001453073.1	3849
BECLIN	Phaeodactylum tricornutum	1634	XP_002176511.1	3849
BECLIN	Phaeodactylum tricornutum	1635	XP_002177919.1	3849
BECLIN	Phytophthora capsici	1636	jgi_[Phytophthora_capsici]_538453|estExt2_Genewise1Plus.C_PHYCAscaffold_11144	3849
BECLIN	Phytophthora capsici	1637	jgi_[Phytophthora_capsici]_546111|estExt2_Genewise1Plus.C_PHYCAscaffold_200122	3849
BECLIN	Pseudo-nitzschia multiseries	1638	1000218060	3849
BECLIN	Reticulomyxa filosa	1639	ETO22350.1	3849
BECLIN	Saccharomyces cerevisiae	1640	NP_015205.1	3849
BECLIN	Salpingoeca rosetta	1641	XP_004990374.1	3849
BECLIN	Symbiodinium minutum	1642	1000254678	3849
BECLIN	Sphaeroforma arctica	1643	XP_014155406.1	3849
BECLIN	Spizellomyces punctatus	1644	XP_016608509.1	3849
BECLIN	Stentor coeruleus	1645	OMJ77214.1	3849
BECLIN	Stentor coeruleus	1646	OMJ90961.1	3849
BECLIN	Stentor coeruleus	1647	OMJ95281.1	3849
BECLIN	Stylonychia lemnae	1648	CDW79094.1	3849
BECLIN	Tetrahymena thermophila	1649	XP_012655476.1	3849
BECLIN	Thalassiosira pseudonana	1650	XP_002291400.1	not used
BECLIN	Thalassiosira pseudonana	1651	XP_002292845.1	3849
BECLIN	Thecamonas trahens	1652	1000100662	3849
BECLIN	Toxoplasma gondii	1653	XP_002369965.1	3849
BECLIN	Trichomonas vaginalis	1654	XP_001305862.1	3849
BECLIN	Trichomonas vaginalis	1655	XP_001305896.1	not used
BECLIN	Trichomonas vaginalis	1656	XP_001307591.1	3849
BECLIN	Trichomonas vaginalis	1657	XP_001308578.1	3849
BECLIN	Trichomonas vaginalis	1658	XP_001315424.1	3849
BECLIN	Tritrichomonas foetus	1659	OHT04642.1	3849
BECLIN	Tritrichomonas foetus	1660	OHT06437.1	3849
BECLIN	Tritrichomonas foetus	1661	OHT11790.1	3849
BECLIN	Tritrichomonas foetus	1662	OHT14774.1	3849
BECLIN	Tritrichomonas foetus	1663	OHT15272.1	3849
BECLIN	Tritrichomonas foetus	1664	OHT16490.1	3849
BECLIN	Trypanosoma brucei	1665	XP_011773603.1	5573
BECLIN	Trypanosoma cruzi	1666	XP_811171.1	5573
BECLIN	Trypanosoma cruzi	1667	XP_817432.1	5573
BECLIN	Ustilago maydis	1668	XP_011390731.1	3849
BECLIN	Vitrella brassicaformis	1669	CEM35886.1	3849
BECLIN	Volvox carteri	1670	XP_002952061.1	3849
BIR	Allomyces macrogynus	1671	KNE56908.1	4780
BIR	Allomyces macrogynus	1672	KNE61528.1	4780
BIR	Bigelowiella natans	1673	1000110431	4780
BIR	Candida albicans	1674	XP_711989.2	4780
BIR	Capsaspora owczarzaki	1675	XP_004342720.1	4780
BIR	Encephalitozoon cuniculi	1676	NP_597408.1	4780
BIR	Euglena gracilis	1677	[Euglena_gracilis]_transcript_1190	4780
BIR	Euglena gracilis	1678	[Euglena_gracilis]_transcript_4348	4780
BIR	Euglena gracilis	1679	[Euglena_gracilis]_transcript_4465	4780
BIR	Euglena gracilis	1680	[Euglena_gracilis]_transcript_18602	4780
BIR	Euglena gracilis	1681	[Euglena_gracilis]_transcript_22643	4780
BIR	Euglena gracilis	1682	[Euglena_gracilis]_transcript_26951	4780
BIR	Euglena gracilis	1683	[Euglena_gracilis]_transcript_46798	4780
BIR	Guillardia theta	1684	XP_005818675.1	4780
BIR	Guillardia theta	1685	XP_005823647.1	4780
BIR	Guillardia theta	1686	XP_005825208.1	4780
BIR	Guillardia theta	1687	XP_005825767.1	4780
BIR	Guillardia theta	1688	XP_005827484.1	not used
BIR	Guillardia theta	1689	XP_005830818.1	not used
BIR	Guillardia theta	1690	XP_005831392.1	7933
BIR	Guillardia theta	1691	XP_005831492.1	4780
BIR	Guillardia theta	1692	XP_005833134.1	4780
BIR	Guillardia theta	1693	XP_005833372.1	4780
BIR	Guillardia theta	1694	XP_005835082.1	4780
BIR	Guillardia theta	1695	XP_005839409.1	4780
BIR	Guillardia theta	1696	XP_005839795.1	not used
BIR	Monocercomonoides exilis	1697	[Monocercomonoides_sp.]_predicted_protein_10839	4780
BIR	Monosiga brevicollis	1698	XP_001743942.1	4780
BIR	Mortierella verticillata	1699	KFH69751.1	4780
BIR	Naegleria gruberi	1700	XP_002683368.1	4780
BIR	Neocallimastix californiae	1701	ORY20073.1	20543
BIR	Neocallimastix californiae	1702	ORY24237.1	4780
BIR	Neocallimastix californiae	1703	ORY77893.1	4780
BIR	Saccharomyces cerevisiae	1704	NP_012622.3	4780
BIR	Salpingoeca rosetta	1705	XP_004997197.1	4780
BIR	Sphaeroforma arctica	1706	XP_014154204.1	4780
BIR	Spizellomyces punctatus	1707	XP_016607644.1	4780
BIR	Stentor coeruleus	1708	OMJ83849.1	4780
BIR	Trachipleistophora hominis	1709	ELQ74931.1	not used
BIR	Ustilago maydis	1710	XP_011390823.1	4780
BIR	Paramecium tetraurelia	1711	XP_001443231.1	not used
DAD	Acanthamoeba castellanii	1712	XP_004353664.1	1645
DAD	Allomyces macrogynus	1713	KNE62402.1	1645
DAD	Allomyces macrogynus	1714	KNE65920.1	1645
DAD	Blastocystis hominis	1715	XP_012899003.1	1645
DAD	Bigelowiella natans	1716	1000122215	1645
DAD	Bremia lactucae	1717	TDH73811.1	1645
DAD	Candida albicans	1718	XP_714406.2	1645
DAD	Capsaspora owczarzaki	1719	XP_004343580.1	1645
DAD	Chlamydomonas reinhardtii	1720	XP_001699953.1	1645
DAD	Chlorella variabilis	1721	XP_005843779.1	1645
DAD	Coccomyxa subellipsoidea	1722	XP_005650176.1	1645
DAD	Cyanophora paradoxa	1723	1000181274	1645
DAD	Cryptosporidium parvum	1724	XP_626167.1	1645
DAD	Cyanidioschyzon merolae	1725	XP_005539303.1	1645
DAD	Dictyostelium discoideum	1726	EAL61955.1	1645
DAD	Ectocarpus siliculosus	1727	CBJ48660.1	1645
DAD	Entamoeba histolytica	1728	XP_653360.1	1645
DAD	Galdieria sulphuraria	1729	XP_005707243.1	1645
DAD	Heterostelium album	1730	XP_020430647.1	1645
DAD	Mortierella verticillata	1731	KFH66699.1	1645
DAD	Naegleria gruberi	1732	XP_002677270.1	1645
DAD	Nannochloropsis gaditana	1733	EWM28787.1	1645
DAD	Neocallimastix californiae	1734	ORY56724.1	1645
DAD	Neocallimastix californiae	1735	ORY87196.1	1645
DAD	Paramecium tetraurelia	1736	XP_001458694.1	1645
DAD	Paramecium tetraurelia	1737	XP_001461596.1	1645
DAD	Phytophthora capsici	1738	jgi_[Phytophthora_capsici]_12623|fgenesh1_pg.PHYCAscaffold_1_#_75	1645
DAD	Plasmodium falciparum	1739	XP_002808792.1	1645
DAD	Porphyridium purpureum	1740	1000034503	1645
DAD	Saccharomyces cerevisiae	1741	NP_014746.2	1645
DAD	Salpingoeca rosetta	1742	XP_004989134.1	1645
DAD	Sphaeroforma arctica	1743	XP_014152996.1	1645
DAD	Spizellomyces punctatus	1744	XP_016609039.1	1645
DAD	Stentor coeruleus	1745	OMJ71810.1	1645
DAD	Stentor coeruleus	1746	OMJ96004.1	1645
DAD	Stylonychia lemnae	1747	CDW89895.1	1645
DAD	Tetrahymena thermophila	1748	XP_001020847.1	1645
DAD	Thecamonas trahens	1749	1000105081	1645
DAD	Toxoplasma gondii	1750	XP_018636152.1	1645
DAD	Trichomonas vaginalis	1751	XP_001327154.1	1645
DAD	Ustilago maydis	1752	XP_011391544.1	1645
DAD	Vitrella brassicaformis	1753	CEL92859.1	1645
DAD	Volvox carteri	1754	XP_002956617.1	1645
ENDOG	Allomyces macrogynus	1755	KNE71328.1	3369
ENDOG	Allomyces macrogynus	1756	KNE72113.1	3369
ENDOG	Bigelowiella natans	1757	1000127427	3369
ENDOG	Bodo saltans	1758	CUG90312.1	3369
ENDOG	Bodo saltans	1759	CUG87734.1	3369
ENDOG	Bodo saltans	1760	CUG87638.1	3369
ENDOG	Bremia lactucae	1761	TDH64815.1	3369
ENDOG	Candida albicans	1762	XP_716805.1	3369
ENDOG	Capsaspora owczarzaki	1763	XP_004342004.1	3369
ENDOG	Capsaspora owczarzaki	1764	XP_004342728.1	3369
ENDOG	Capsaspora owczarzaki	1765	XP_004345060.1	3369
ENDOG	Capsaspora owczarzaki	1766	XP_004364458.1	3369
ENDOG	Capsaspora owczarzaki	1767	XP_011270394.1	3369
ENDOG	Chlamydomonas reinhardtii	1768	XP_001696018.1	3369
ENDOG	Coccomyxa subellipsoidea	1769	XP_005643812.1	4892
ENDOG	Coccomyxa subellipsoidea	1770	XP_005648352.1	3369
ENDOG	Cryptosporidium parvum	1771	XP_626157.1	3369
ENDOG	Dictyostelium discoideum	1772	EAL63675.1	3369
ENDOG	Ectocarpus siliculosus	1773	CBN74384.1	3369
ENDOG	Emiliania huxleyi	1774	XP_005768044.1	3369
ENDOG	Emiliania huxleyi	1775	XP_005789488.1	3369
ENDOG	Fistulifera solaris	1776	GAX10535.1	3369
ENDOG	Guillardia theta	1777	XP_005823481.1	3369
ENDOG	Heterostelium album	1778	XP_020433303.1	3369
ENDOG	Leishmania donovani	1779	XP_003858902.1	3369
ENDOG	Leishmania donovani	1780	XP_003859328.1	5536
ENDOG	Leishmania major	1781	XP_001681394.1	3369
ENDOG	Leishmania major	1782	XP_001681871.1	5536
ENDOG	Monosiga brevicollis	1783	XP_001744571.1	3369
ENDOG	Monosiga brevicollis	1784	XP_001749843.1	3369
ENDOG	Mortierella verticillata	1785	KFH62174.1	3369
ENDOG	Naegleria gruberi	1786	XP_002679004.1	3369
ENDOG	Naegleria gruberi	1787	XP_002681224.1	3369
ENDOG	Neocallimastix californiae	1788	ORY54333.1	3369
ENDOG	Neocallimastix californiae	1789	ORY55192.1	3369
ENDOG	Ostreococcus tauri	1790	XP_022838318.1	3369
ENDOG	Phaeodactylum tricornutum	1791	XP_002182876.1	3369
ENDOG	Phytophthora capsici	1792	jgi_[Phytophthora_capsici]_98132|e_gw1.2.125.1	3369
ENDOG	Pseudo-nitzschia multiseries	1793	1000208685	3369
ENDOG	Reticulomyxa filosa	1794	ETN99275.1	3369
ENDOG	Reticulomyxa filosa	1795	ETO00942.1	3369
ENDOG	Saccharomyces cerevisiae	1796	NP_012327.1	3369
ENDOG	Salpingoeca rosetta	1797	XP_004989633.1	3369
ENDOG	Salpingoeca rosetta	1798	XP_004992645.1	3369
ENDOG	Symbiodinium minutum	1799	1000243223	3369
ENDOG	Sphaeroforma arctica	1800	XP_014155350.1	3369
ENDOG	Spizellomyces punctatus	1801	XP_016605293.1	3369
ENDOG	Spizellomyces punctatus	1802	XP_016605026.1	3369
ENDOG	Thalassiosira pseudonana	1803	XP_002293382.1	3369
ENDOG	Thecamonas trahens	1804	1000103202	3369
ENDOG	Toxoplasma gondii	1805	XP_018638478.1	3369
ENDOG	Trypanosoma brucei	1806	XP_011775712.1	3369
ENDOG	Trypanosoma cruzi	1807	XP_806210.1	3369
ENDOG	Trypanosoma cruzi	1808	XP_808976.1	5536
ENDOG	Trypanosoma cruzi	1809	XP_809698.1	5536
ENDOG	Trypanosoma cruzi	1810	XP_813011.1	3369
ENDOG	Ustilago maydis	1811	XP_011391435.1	3369
ENDOG	Vitrella brassicaformis	1812	CEM24561.1	3369
ENDOG	Volvox carteri	1813	XP_002957269.1	3369
ENDOG	Volvox carteri	1814	XP_002957270.1	3369
ENDOG	Volvox carteri	1815	XP_002957302.1	3369
ENDOG	Trypanosoma brucei	1816	XP_011775712.1	3369
ENDOG	inactive_1817 *** Blast input ***	1817	UPI00018FA680_status=[inactive]	3369
ENDOG	inactive_1818 *** Blast input ***	1818	UPI000193E68C_status=[inactive]	3369
ENDOG	Leishmania infantum_1819 *** Blast input ***	1819	ABY89724.1	3369
ENDOG	Felis catus_1820 *** Blast input ***	1820	ABJ16423.1	3369
ENDOG	Homo sapiens_1821 *** Blast input ***	1821	CAA55963.1	3369
ENDOG	Cricetulus griseus_1822 *** Blast input ***	1822	RLQ76663.1	3369
ENDOG	Cricetulus griseus_1823 *** Blast input ***	1823	RLQ64001.1	3369
ENDOG	Drosophila busckii_1824 *** Blast input ***	1824	ALC42588.1	3369
ENDOG	Danaus plexippus plexippus_1825 *** Blast input ***	1825	OWR48061.1	3369
ENDOG	Bombyx mori_1826 *** Blast input ***	1826	ADM32517.1	3369
ENDOG	Operophtera brumata_1827 *** Blast input ***	1827	KOB68962.1	3369
ENDOG	Homo sapiens_1828 *** Blast input ***	1828	NP_004426.2	3369
ENDOG	Mus musculus_1829 *** Blast input ***	1829	NP_031957.1	3369
ENDOG	Bos taurus_1830 *** Blast input ***	1830	NP_787017.1	3369
ENDOG	Rattus norvegicus_1831 *** Blast input ***	1831	NP_001030110.1	3369
ENDOG	Leishmania panamensis_1832 *** Blast input ***	1832	ACR81579.1	3369
ENDOG	Leishmania braziliensis_1833 *** Blast input ***	1833	ACR81578.1	3369
ENDOG	Drosophila melanogaster_1834 *** Blast input ***	1834	AAF58564.1	3369
ENDOG	Callithrix jacchus_1835 *** Blast input ***	1835	ABY84164.1	3369
ENDOG	Castor canadensis_1836 *** Blast input ***	1836	JAV36242.1	3369
ENDOG	Danio rerio_1837 *** Blast input ***	1837	NP_001019385.1	3369
ENDOG	Zonotrichia albicollis_1838 *** Blast input ***	1838	XP_005490636.2	3369
ENDOG	Pteropus alecto_1839 *** Blast input ***	1839	XP_006918098.1	3369
ENDOG	Homo sapiens_1840 *** Blast input ***	1840	XP_011516649.1	3369
ENDOG	Xenopus laevis_1841 *** Blast input ***	1841	NP_001088718.1	3369
ENDOG	Xenopus tropicalis_1842 *** Blast input ***	1842	NP_001017202.1	3369
ENDOG	Rousettus aegyptiacus_1843 *** Blast input ***	1843	XP_015989259.1	3369
ENDOG	Parachlamydia acanthamoebae_1844 *** Blast input ***	1844	KIA78599.1	3369
ENDOG	Physeter catodon_1845 *** Blast input ***	1845	XP_007103866.2	3369
ENDOG	Eptesicus fuscus_1846 *** Blast input ***	1846	XP_008150945.1	3369
ENDOG	Ovis aries_1847 *** Blast input ***	1847	XP_004005642.1	3369
ENDOG	Chelonia mydas_1848 *** Blast input ***	1848	XP_007061186.1	3369
ENDOG	Lagenorhynchus obliquidens_1849 *** Blast input ***	1849	XP_026960428.1	3369
ENDOG	Acinonyx jubatus_1850 *** Blast input ***	1850	XP_026891131.1	3369
ENDOG	Electrophorus electricus_1851 *** Blast input ***	1851	XP_026865780.1	3369
ENDOG	Electrophorus electricus_1852 *** Blast input ***	1852	XP_026865779.1	3369
ENDOG	Pangasianodon hypophthalmus_1853 *** Blast input ***	1853	XP_026783727.1	3369
ENDOG	Athene cunicularia_1854 *** Blast input ***	1854	XP_026716470.1	3369
ENDOG	Microtus ochrogaster_1855 *** Blast input ***	1855	XP_005346201.1	3369
ENDOG	Pseudonaja textilis_1856 *** Blast input ***	1856	XP_026568054.1	3369
ENDOG	Notechis scutatus_1857 *** Blast input ***	1857	XP_026547708.1	3369
ENDOG	Piliocolobus tephrosceles_1858 *** Blast input ***	1858	XP_026312901.1	3369
ENDOG	Urocitellus parryii_1859 *** Blast input ***	1859	XP_026242061.1	3369
ENDOG	Mastacembelus armatus_1860 *** Blast input ***	1860	XP_026177318.1	3369
ENDOG	Carassius auratus_1861 *** Blast input ***	1861	XP_026125270.1	3369
ENDOG	Astatotilapia calliptera_1862 *** Blast input ***	1862	XP_026043609.1	3369
ENDOG	Dromaius novaehollandiae_1863 *** Blast input ***	1863	XP_025966596.1	3369
ENDOG	Apteryx rowi_1864 *** Blast input ***	1864	XP_025915560.1	3369
ENDOG	Nothoprocta perdicaria_1865 *** Blast input ***	1865	XP_025905367.1	3369
ENDOG	Puma concolor_1866 *** Blast input ***	1866	XP_025769432.1	3369
ENDOG	Callorhinus ursinus_1867 *** Blast input ***	1867	XP_025743833.1	3369
ENDOG	Canis lupus dingo_1868 *** Blast input ***	1868	XP_025331169.1	3369
ENDOG	Theropithecus gelada_1869 *** Blast input ***	1869	XP_025214432.1	3369
ENDOG	Bubalus bubalis_1870 *** Blast input ***	1870	XP_025117587.1	3369
ENDOG	Pelodiscus sinensis_1871 *** Blast input ***	1871	XP_025038379.1	3369
ENDOG	Python bivittatus_1872 *** Blast input ***	1872	XP_025025718.1	3369
ENDOG	Gallus gallus_1873 *** Blast input ***	1873	XP_004945911.1	3369
ENDOG	Cynoglossus semilaevis_1874 *** Blast input ***	1874	XP_008334598.1	3369
ENDOG	Kryptolebias marmoratus_1875 *** Blast input ***	1875	XP_017292080.2	3369
ENDOG	Macaca nemestrina_1876 *** Blast input ***	1876	XP_011709865.1	3369
ENDOG	Neophocaena asiaeorientalis asiaeorientalis_1877 *** Blast input ***	1877	XP_024618456.1	3369
ENDOG	Desmodus rotundus_1878 *** Blast input ***	1878	XP_024418125.1	3369
ENDOG	Pan troglodytes_1879 *** Blast input ***	1879	XP_016817299.1	3369
ENDOG	Oryzias melastigma_1880 *** Blast input ***	1880	XP_024130697.1	3369
ENDOG	Pongo abelii_1881 *** Blast input ***	1881	XP_002820316.1	3369
ENDOG	Salvelinus alpinus_1882 *** Blast input ***	1882	XP_023858936.1	3369
ENDOG	Chrysemys picta bellii_1883 *** Blast input ***	1883	XP_005293543.1	3369
ENDOG	Oryzias latipes_1884 *** Blast input ***	1884	XP_004072832.1	3369
ENDOG	Myotis lucifugus_1885 *** Blast input ***	1885	XP_023600212.1	3369
ENDOG	Myotis lucifugus_1886 *** Blast input ***	1886	XP_023600211.1	3369
ENDOG	Myotis lucifugus_1887 *** Blast input ***	1887	XP_006103214.1	3369
ENDOG	Octodon degus_1888 *** Blast input ***	1888	XP_004640530.1	3369
ENDOG	Equus caballus_1889 *** Blast input ***	1889	XP_023484840.1	3369
ENDOG	Pteropus vampyrus_1890 *** Blast input ***	1890	XP_023388758.1	3369
ENDOG	Cavia porcellus_1891 *** Blast input ***	1891	XP_003470644.1	3369
ENDOG	Dasypus novemcinctus_1892 *** Blast input ***	1892	XP_004463134.1	3369
ENDOG	Loxodonta africana_1893 *** Blast input ***	1893	XP_010586288.1	3369
ENDOG	Otolemur garnettii_1894 *** Blast input ***	1894	XP_003794967.1	3369
ENDOG	Sarcophilus harrisii_1895 *** Blast input ***	1895	XP_023350054.1	3369
ENDOG	Seriola lalandi dorsalis_1896 *** Blast input ***	1896	XP_023251244.1	3369
ENDOG	Xiphophorus maculatus_1897 *** Blast input ***	1897	XP_014326471.1	3369
ENDOG	Amphiprion ocellaris_1898 *** Blast input ***	1898	XP_023150822.1	3369
ENDOG	Columba livia_1899 *** Blast input ***	1899	PKK24372.1	3369
ENDOG	Felis catus_1900 *** Blast input ***	1900	XP_003996049.2	3369
ENDOG	Stylophora pistillata_1901 *** Blast input ***	1901	PFX16197.1	3369
ENDOG	Seriola dumerili_1902 *** Blast input ***	1902	XP_022622280.1	3369
ENDOG	Astyanax mexicanus_1903 *** Blast input ***	1903	XP_007228964.2	3369
ENDOG	Delphinapterus leucas_1904 *** Blast input ***	1904	XP_022434248.1	3369
ENDOG	Canis lupus familiaris_1905 *** Blast input ***	1905	XP_851160.3	3369
ENDOG	Acanthochromis polyacanthus_1906 *** Blast input ***	1906	XP_022076919.1	3369
ENDOG	Acanthochromis polyacanthus_1907 *** Blast input ***	1907	XP_022076918.1	3369
ENDOG	Papio anubis_1908 *** Blast input ***	1908	XP_003911264.1	3369
ENDOG	Ictidomys tridecemlineatus_1909 *** Blast input ***	1909	XP_005321109.1	3369
ENDOG	Carlito syrichta_1910 *** Blast input ***	1910	XP_008048816.1	3369
ENDOG	Neomonachus schauinslandi_1911 *** Blast input ***	1911	XP_021547160.1	3369
ENDOG	Aotus nancymaae_1912 *** Blast input ***	1912	XP_012313283.1	3369
ENDOG	Meriones unguiculatus_1913 *** Blast input ***	1913	XP_021503497.1	3369
ENDOG	Oncorhynchus mykiss_1914 *** Blast input ***	1914	XP_021461034.1	3369
ENDOG	Lonchura striata domestica_1915 *** Blast input ***	1915	XP_021407070.1	3369
ENDOG	Numida meleagris_1916 *** Blast input ***	1916	XP_021270035.1	3369
ENDOG	Fundulus heteroclitus_1917 *** Blast input ***	1917	XP_012707311.1	3369
ENDOG	Heterocephalus glaber_1918 *** Blast input ***	1918	XP_021117568.1	3369
ENDOG	Heterocephalus glaber_1919 *** Blast input ***	1919	XP_004849239.1	3369
ENDOG	Mesocricetus auratus_1920 *** Blast input ***	1920	XP_005085539.1	3369
ENDOG	Mus caroli_1921 *** Blast input ***	1921	XP_021011604.1	3369
ENDOG	Mus pahari_1922 *** Blast input ***	1922	XP_021048506.1	3369
ENDOG	Sus scrofa_1923 *** Blast input ***	1923	XP_003122256.1	3369
ENDOG	Phascolarctos cinereus_1924 *** Blast input ***	1924	XP_020821192.1	3369
ENDOG	Boleophthalmus pectinirostris_1925 *** Blast input ***	1925	XP_020790422.1	3369
ENDOG	Odocoileus virginianus texanus_1926 *** Blast input ***	1926	XP_020730485.1	3369
ENDOG	Pogona vitticeps_1927 *** Blast input ***	1927	XP_020650576.1	3369
ENDOG	Labrus bergylta_1928 *** Blast input ***	1928	XP_020496451.1	3369
ENDOG	Corvus cornix cornix_1929 *** Blast input ***	1929	XP_010396286.1	3369
ENDOG	Rhincodon typus_1930 *** Blast input ***	1930	XP_020371327.1	3369
ENDOG	Patagioenas fasciata monilis_1931 *** Blast input ***	1931	OPJ67812.1	3369
ENDOG	Oncorhynchus kisutch_1932 *** Blast input ***	1932	XP_020324121.1	3369
ENDOG	Microcebus murinus_1933 *** Blast input ***	1933	XP_012627617.1	3369
ENDOG	Paralichthys olivaceus_1934 *** Blast input ***	1934	XP_019965053.1	3369
ENDOG	Paralichthys olivaceus_1935 *** Blast input ***	1935	XP_019965052.1	3369
ENDOG	Esox lucius_1936 *** Blast input ***	1936	XP_010875454.1	3369
ENDOG	Bos indicus_1937 *** Blast input ***	1937	XP_019826540.1	3369
ENDOG	Hippocampus comes_1938 *** Blast input ***	1938	XP_019741201.1	3369
ENDOG	Hippocampus comes_1939 *** Blast input ***	1939	XP_019741200.1	3369
ENDOG	Ailuropoda melanoleuca_1940 *** Blast input ***	1940	XP_011218033.1	3369
ENDOG	Meleagris gallopavo_1941 *** Blast input ***	1941	XP_010719162.1	3369
ENDOG	Aptenodytes forsteri_1942 *** Blast input ***	1942	XP_009285281.1	3369
ENDOG	Fukomys damarensis_1943 *** Blast input ***	1943	XP_010625634.1	3369
ENDOG	Parus major_1944 *** Blast input ***	1944	XP_015500356.1	3369
ENDOG	Gorilla gorilla gorilla_1945 *** Blast input ***	1945	XP_004048745.1	3369
ENDOG	Nannospalax galili_1946 *** Blast input ***	1946	XP_008842228.1	3369
ENDOG	synthetic construct_1947 *** Blast input ***	1947	AAX29001.1	3369
ENDOG	Oryctolagus cuniculus_1948 *** Blast input ***	1948	XP_008250989.1	3369
ENDOG	Poecilia reticulata_1949 *** Blast input ***	1949	XP_008400767.1	3369
ENDOG	Poecilia formosa_1950 *** Blast input ***	1950	XP_007578358.1	3369
ENDOG	Monodelphis domestica_1951 *** Blast input ***	1951	XP_001367912.1	3369
ENDOG	Ficedula albicollis_1952 *** Blast input ***	1952	XP_005055840.1	3369
ENDOG	Miniopterus natalensis_1953 *** Blast input ***	1953	XP_016079039.1	3369
ENDOG	Erinaceus europaeus_1954 *** Blast input ***	1954	XP_007527133.1	3369
ENDOG	Peromyscus maniculatus bairdii_1955 *** Blast input ***	1955	XP_006983465.1	3369
ENDOG	Nothobranchius furzeri_1956 *** Blast input ***	1956	XP_015815929.1	3369
ENDOG	Lygus hesperus_1957 *** Blast input ***	1957	JAQ04948.1	3369
ENDOG	Coturnix japonica_1958 *** Blast input ***	1958	XP_015734413.1	3369
ENDOG	Protobothrops mucrosquamatus_1959 *** Blast input ***	1959	XP_015684177.1	3369
ENDOG	Myotis davidii_1960 *** Blast input ***	1960	XP_015422521.1	3369
ENDOG	Panthera tigris altaica_1961 *** Blast input ***	1961	XP_015391549.1	3369
ENDOG	Marmota marmota marmota_1962 *** Blast input ***	1962	XP_015352962.1	3369
ENDOG	Gekko japonicus_1963 *** Blast input ***	1963	XP_015272669.1	3369
ENDOG	Cyprinodon variegatus_1964 *** Blast input ***	1964	XP_015258053.1	3369
ENDOG	Lepisosteus oculatus_1965 *** Blast input ***	1965	XP_015222368.1	3369
ENDOG	Lepisosteus oculatus_1966 *** Blast input ***	1966	XP_015222367.1	3369
ENDOG	Lepisosteus oculatus_1967 *** Blast input ***	1967	XP_006640741.1	3369
ENDOG	Vicugna pacos_1968 *** Blast input ***	1968	XP_006205507.1	3369
ENDOG	Macaca mulatta_1969 *** Blast input ***	1969	XP_014972157.1	3369
ENDOG	Ovis aries musimon_1970 *** Blast input ***	1970	XP_012002851.1	3369
ENDOG	Poecilia latipinna_1971 *** Blast input ***	1971	XP_014874951.1	3369
ENDOG	Poecilia mexicana_1972 *** Blast input ***	1972	XP_014826286.1	3369
ENDOG	Calidris pugnax_1973 *** Blast input ***	1973	XP_014798552.1	3369
ENDOG	Sturnus vulgaris_1974 *** Blast input ***	1974	XP_014728671.1	3369
ENDOG	Equus asinus_1975 *** Blast input ***	1975	XP_014718781.1	3369
ENDOG	Myotis brandtii_1976 *** Blast input ***	1976	XP_005881595.2	3369
ENDOG	Bos mutus_1977 *** Blast input ***	1977	XP_014337922.1	3369
ENDOG	Latimeria chalumnae_1978 *** Blast input ***	1978	XP_005992152.1	3369
ENDOG	Haplochromis burtoni_1979 *** Blast input ***	1979	XP_005952325.1	3369
ENDOG	Salmo salar_1980 *** Blast input ***	1980	XP_014027881.1	3369
ENDOG	Austrofundulus limnaeus_1981 *** Blast input ***	1981	XP_013883609.1	3369
ENDOG	Apteryx australis mantelli_1982 *** Blast input ***	1982	XP_013805121.1	3369
ENDOG	Pundamilia nyererei_1983 *** Blast input ***	1983	XP_005755191.1	3369
ENDOG	Chinchilla lanigera_1984 *** Blast input ***	1984	XP_005413698.2	3369
ENDOG	Anser cygnoides domesticus_1985 *** Blast input ***	1985	XP_013054092.1	3369
ENDOG	Mustela putorius furo_1986 *** Blast input ***	1986	XP_004757479.1	3369
ENDOG	Dipodomys ordii_1987 *** Blast input ***	1987	XP_012876727.1	3369
ENDOG	Echinops telfairi_1988 *** Blast input ***	1988	XP_004713401.1	3369
ENDOG	Sorex araneus_1989 *** Blast input ***	1989	XP_004613527.1	3369
ENDOG	Ochotona princeps_1990 *** Blast input ***	1990	XP_004593566.1	3369
ENDOG	Condylura cristata_1991 *** Blast input ***	1991	XP_004677949.1	3369
ENDOG	Propithecus coquereli_1992 *** Blast input ***	1992	XP_012495205.1	3369
ENDOG	Odobenus rosmarus divergens_1993 *** Blast input ***	1993	XP_004392559.1	3369
ENDOG	Taeniopygia guttata_1994 *** Blast input ***	1994	XP_002194775.2	3369
ENDOG	Orcinus orca_1995 *** Blast input ***	1995	XP_004269177.1	3369
ENDOG	Nomascus leucogenys_1996 *** Blast input ***	1996	XP_012364137.1	3369
ENDOG	Colobus angolensis palliatus_1997 *** Blast input ***	1997	XP_011786838.1	3369
ENDOG	Mandrillus leucophaeus_1998 *** Blast input ***	1998	XP_011844015.1	3369
ENDOG	Takifugu rubripes_1999 *** Blast input ***	1999	XP_011617915.1	3369
[truncated: 1,853 more rows]
